# Supplementary material for: Wide band gap selenide infrared nonlinear optical materials AIIMg6Ga6Se16 with strong SHG responses and high laser-induced damage thresholds
Source: Royal Society of Chemistry journal article supplement (doi:10.1039/d4sc00334a), 2024-01-01
Supplement: d4sc00334a1.pdf [file d4sc00334a1.pdf]

Supplementary Materials

for

**Wide band gap selenide infrared nonlinear optical materials  $A^{II}Mg_6Ga_6Se_{16}$  with strong SHG responses and high laser-induced damage thresholds**

Linan Wang,<sup>‡ab</sup> Dongdong Chu,<sup>‡ab</sup> Zihua Yang,<sup>ab</sup> Junjie Li <sup>\*ab</sup> and Shilie Pan <sup>\*ab</sup>

*<sup>a</sup>Research Center for Crystal Materials; State Key Laboratory of Functional Materials and Devices for Special Environmental Conditions; Xinjiang Key Laboratory of Functional Crystal Materials; Xinjiang Technical Institute of Physics & Chemistry, CAS, 40-1 South Beijing Road, Urumqi 830011, China*

*<sup>b</sup>Center of Materials Science and Optoelectronics Engineering, University of Chinese Academy of Sciences, Beijing 100049, China*

<sup>‡</sup>These authors contributed equally to this work.

\*Corresponding authors (emails: lijunjie@ms.xjb.ac.cn (J.J. Li); slpan@ms.xjb.ac.cn (S.L. Pan))

Table S1. Crystal data and structure refinements for  $A^{II}Mg_6Ga_6Se_{16}$  ( $A^{II} = Ca, Sr, Ba$ ).

Table S2. Atomic coordinates ( $\times 10^4$ ), equivalent isotropic displacement parameters ( $\text{\AA}^2 \times 10^3$ ) and bond valence calculations for  $CaMg_6Ga_6Se_{16}$ .

Table S3 Selected bond lengths [ $\text{\AA}$ ] for  $CaMg_6Ga_6Se_{16}$ .

Table S4. Selected bond angles [ $^\circ$ ] for  $CaMg_6Ga_6Se_{16}$ .

Table S5. Anisotropic displacement parameters ( $\text{\AA}^2 \times 10^3$ ) for  $CaMg_6Ga_6Se_{16}$ .

Table S6. Atomic coordinates ( $\times 10^4$ ), equivalent isotropic displacement parameters ( $\text{\AA}^2 \times 10^3$ ) and bond valence calculations for  $SrMg_6Ga_6Se_{16}$ .

Table S7. Selected bond lengths [ $\text{\AA}$ ] for  $SrMg_6Ga_6Se_{16}$ .

Table S8. Selected bond angles [ $^\circ$ ] for  $SrMg_6Ga_6Se_{16}$ .

Table S9. Anisotropic displacement parameters ( $\text{\AA}^2 \times 10^3$ ) for  $SrMg_6Ga_6Se_{16}$ .

Table S10. Atomic coordinates ( $\times 10^4$ ), equivalent isotropic displacement parameters ( $\text{\AA}^2 \times 10^3$ ) and bond valence calculations for  $BaMg_6Ga_6Se_{16}$ .

Table S11. Selected bond lengths [ $\text{\AA}$ ] for  $BaMg_6Ga_6Se_{16}$ .

Table S12. Selected bond angles [ $^\circ$ ] for  $BaMg_6Ga_6Se_{16}$ .

Table S13. Anisotropic displacement parameters ( $\text{\AA}^2 \times 10^3$ ) for  $BaMg_6Ga_6Se_{16}$ .

Table S14. The optical properties of  $A^{II}Mg_6Ga_6Se_{16}$  ( $A^{II} = Ca, Sr, Ba$ ).

Figure S1. The EDS spectra of (a)  $CaMg_6Ga_6Se_{16}$ ; (b)  $SrMg_6Ga_6Se_{16}$ ; (c)  $BaMg_6Ga_6Se_{16}$ .

Figure S2. The Raman spectra of  $A^{II}Mg_6Ga_6Se_{16}$  ( $A^{II} = Ca, Sr, Ba$ ).

Figure S3. The XRD patterns of (a)  $SrMg_6Ga_6Se_{16}$ ; (b)  $BaMg_6Ga_6Se_{16}$ .

Figure S4. The band structures, total and partial density of states of  $SrMg_6Ga_6Se_{16}$  (a,b);  $BaMg_6Ga_6Se_{16}$  (c,d).

Figure S5. The bonding electron density differences ( $\Delta\rho^b$ ) of  $[A^{II}Se_6]$  triangular prisms,  $[MgSe_6]$  octahedra and  $[GaSe_4]$  tetrahedra in  $A^{II}Mg_6Ga_6Se_{16}$  calculated by REDA method.

Figure S6. SHG density maps of occupied and unoccupied orbitals in the VE process. (a,b)  $SrMg_6Ga_6Se_{16}$ ; (c,d)  $BaMg_6Ga_6Se_{16}$ .

## EXPERIMENTS AND CALCULATIONS

**1 Reagents.** Mg (99 %), Ca (99.5 %), Sr (99.9 %), Ba (99.9 %), Ga (99.999 %) and Se (99.9 %) were purchased from Shanghai Aladdin Biochemical Technology Co., Ltd. (China). The raw reagents were stored in a dry Ar-filled glove box with oxygen and moisture levels below 0.1 ppm, and utilized without further purifications.

**2 Syntheses.** The crystallized samples of the title compounds were fabricated by the high temperature solid-state reactions with the starting mixtures Ca/Sr/Ba : Mg : Ga : Se = 1 : 6 : 6 : 16. First, the mixtures were mixed, ground and put into graphite crucibles. Then, the crucibles were placed into quartz tubes, which were further sealed with oxyhydrogen flame under a high vacuum of  $10^{-3}$  Pa. After that, the samples were put into a computer-controlled furnace and slowly heated to 900 °C, kept for 2000 mins, then cooled to room temperature in 8600 mins. After reactions, the pure polycrystalline powder samples were harvested.

**3 Single-Crystal X-ray Diffractions.** A Bruker SMART APEX II CCD single crystal X-ray diffractometer using Mo K $\alpha$  radiation ( $\lambda = 0.71073$  Å) was performed to measure crystal diffraction data at room temperature. The SAINT program was utilized to integrate the diffraction data.<sup>1</sup> The crystal structures were refined and resolved by the SHELXTL program package.<sup>2</sup>

**4 Energy-Dispersive X-ray Spectroscopy (EDS).** The EDS spectra of the single crystals were characterized on a field emission scanning electron microscope (FE-SEM, JEOL JSM-7610F Plus, Japan) equipped with an energy-dispersive X-ray spectrometer (Oxford, X-Max 50).

**5 Raman Spectroscopy.** The powder samples were placed on the glass plates and tested by a LABRAM HR Evolution spectrometer (Japan) equipped with a CCD detector (532 nm radiation). The spectra were collected from 4000 to 40  $\text{cm}^{-1}$ .

**6 Powder X-ray Diffractions.** A Bruker D2 PHASER diffractometer (Germany) with Cu  $K\alpha$  radiation ( $\lambda = 1.5418 \text{ \AA}$ ) was applied for the measurement of powder XRD patterns at room temperature. The  $2\theta$  range was set to  $5\text{--}70^\circ$  with a fixed counting time of 1 s/step.

**7 UV-Vis-NIR Diffuse Reflectance Spectroscopy.** The optical diffuse-reflectance spectra of powder samples were tested on a SolidSpec-3700DUV spectrophotometer from 176 to 2600 nm at room temperature. The collected spectra data were converted to optical absorbance by the Kubelka-Munk function:<sup>3</sup>

$$F(R) = K/S = (1-R)^2/2R \quad (1)$$

where, R, K and S represent the reflection coefficient, absorption value, scattering coefficient, respectively.

**8 LIDT Measurements.** The LIDTs of powder samples with the particle size of  $\leq 45 \mu\text{m}$  were evaluated by the single-pulse LIDT method with an incident laser at  $1.06 \mu\text{m}$  (frequency  $f = 10 \text{ Hz}$  and pulse width  $\tau_p = 10 \text{ ns}$ ) at room temperature, where AGS samples with same size were used as the references.<sup>4</sup>

**9 SHG Measurements.** The SHG responses of powder samples were evaluated by the Kurtz-Perry method.<sup>5</sup> The polycrystalline samples of the title compounds were ground and sieved into distinct particle size ranges ( $\leq 45$ ,  $45\text{--}63$ ,  $63\text{--}90$ ,  $90\text{--}125$ ,  $125\text{--}180$  and  $180\text{--}212 \mu\text{m}$ ), and AGS powder samples with same particle sizes were

used as the references. The measurements were carried out on a 2.09- $\mu\text{m}$  Q-switch laser at room temperature.

**10 Theoretical Calculations.** The band structures, partial and total density of states and birefringences of  $A^{\text{II}}\text{Mg}_6\text{Ga}_6\text{Se}_{16}$  ( $A^{\text{II}} = \text{Ca}, \text{Sr}, \text{Ba}$ ) were calculated by the plane wave pseudopotential method that implemented in the CASTEP software.<sup>6</sup> The exchange-correlation potential was treated by the Perdew-Burke-Ernzerhof (PBE) method in the generalized gradient approximation (GGA).<sup>7</sup> The interactions between the ionic cores and electrons were described by norm-conserving pseudopotential (NCP).<sup>8</sup> The following orbital electrons were treated as valence electrons: Ca  $3s^23p^64s^2$ , Sr  $4s^24p^65s^2$ , Ba  $6s^25p^66s^2$ , Mg  $2s^22p^63s^2$ , Ga  $3d^{10}4s^24p^1$  and Se  $4s^24p^4$  in the calculations. The plane-wave energy cutoff was set to 900 eV, and Monkhorst-Pack k-point meshes were adopted by  $3 \times 3 \times 6$  with a density  $< 0.02 \text{ \AA}^{-1}$  in the Brillouin zone (BZ).<sup>9</sup> The Heyd-Scuseria-Ernzerhof 06 (HSE06) hybrid function was performed using the PWmat code, which runs on graphics processing unit processors (GPU).<sup>10</sup> The other calculation parameters and convergent criteria used the default values of the CASTEP code.

The static SHG susceptibilities can be ascribed to virtual electron (VE) and virtual-hole (VH) processes. At a zero frequency, the formula of second-order NLO coefficients can be derived as:<sup>11</sup>

$$\chi_{\alpha\beta\gamma}^{(2)} = \chi_{\alpha\beta\gamma}^{(2)} (VE) + \chi_{\alpha\beta\gamma}^{(2)} (VH) \quad (2)$$

$$\chi_{\alpha\beta\gamma}^{(2)} (VE) = \frac{e^3}{2\hbar^2 m^3} \sum_{vv'c} \int \frac{d^3k}{4\pi^3} P(\alpha\beta\gamma) \text{Im}[P_{vv'}^{\alpha} P_{cv}^{\beta} P_{cv'}^{\gamma}] \left( \frac{1}{\omega_{cv}^3 \omega_{v'c}^2} + \frac{1}{\omega_{vc}^4 \omega_{cv}'} \right) \quad (3)$$

$$\chi_{\alpha\beta\gamma}^{(2)}(VH) = \frac{e^3}{2\hbar^2 m^3} \sum_{vcc} \int \frac{d^3k}{4\pi^3} P(\alpha\beta\gamma) \text{Im}[P_{cv}^\alpha P_{cc}^\beta P_{c'v}^\gamma] \left( \frac{1}{\omega_{cv}^3 \omega_{vc}^2} + \frac{1}{\omega_{vc}^4 \omega_{c'v}} \right) \quad (4)$$

where,  $\alpha, \beta$  and  $\gamma$  are the Cartesian components;  $v$  and  $v'$  are the denote valence bands;  $c$  and  $c'$  are the denote conduction bands;  $P(\alpha\beta\gamma)$  is full permutation;  $\hbar\omega_{ij}$  is the band energy difference;  $P_{ij}$  is the momentum matrix elements.

The hyperpolarizabilities ( $\beta$ ) were computed by Gaussian 09 revision D.01 program.<sup>10</sup> The GaussView 5 software visualizes the output file.  $\beta_i$  and  $\beta_{tot}$  can be expressed as:

$$\beta_i = \frac{1}{3} \sum_j \beta_{ijj} + \beta_{jji} + \beta_{jjj}, \quad i, j = \{x, y, z\} \quad (5)$$

$$\beta_{tot} = \sqrt{(\beta_x^2 + \beta_y^2 + \beta_z^2)} \quad (6)$$

Response Electron Distribution Anisotropy Index (REDA,  $\zeta$ ) reflects birefringence and response charge density can be reduced by:<sup>12</sup>

$$\zeta = \sum_g \left[ \frac{N_c Z_a \Delta\rho^b}{n_1 E_o} \right]_g \quad (7)$$

where  $N_c$  represents nearest neighbor coordination number,  $Z_a$  is formal charge of anion;  $\Delta\rho^b = \rho_{max}^b - \rho_{min}^b$ ,  $\rho_{max}^b$  and  $\rho_{min}^b$  are the maximum and minimum of the covalent electron density of the covalent bond on the optical principal axes of a crystal;  $n_1$  and  $E_o$  are the minimum refractive index and optical band gap, respectively.

Table S1. Crystal data and structure refinements for  $A^{II}Mg_6Ga_6Se_{16}$  ( $A^{II} = Ca, Sr, Ba$ ).

|                                                |                                                               |                                                               |                                                               |
|------------------------------------------------|---------------------------------------------------------------|---------------------------------------------------------------|---------------------------------------------------------------|
| Empirical formula                              | CaMg <sub>6</sub> Ga <sub>6</sub> Se <sub>16</sub>            | SrMg <sub>6</sub> Ga <sub>6</sub> Se <sub>16</sub>            | BaMg <sub>6</sub> Ga <sub>6</sub> Se <sub>16</sub>            |
| Formula weight                                 | 1867.62                                                       | 1915.16                                                       | 1964.88                                                       |
| Crystal system                                 | hexagonal                                                     |                                                               |                                                               |
| Space group                                    | $P\bar{6}$                                                    |                                                               |                                                               |
| $a/\text{\AA}$                                 | 17.5327(3)                                                    | 17.6115(9)                                                    | 17.7326(6)                                                    |
| $c/\text{\AA}$                                 | 7.7603(2)                                                     | 7.7684(3)                                                     | 7.7899(3)                                                     |
| Volume/ $\text{\AA}^3$                         | 2065.89(9)                                                    | 2086.70(2)                                                    | 2121.33(17)                                                   |
| $Z$                                            | 3                                                             | 3                                                             | 3                                                             |
| $\rho_{\text{calc}}/\text{g cm}^{-3}$          | 4.504                                                         | 4.572                                                         | 4.614                                                         |
| $\mu/\text{mm}^{-1}$                           | 27.248                                                        | 28.689                                                        | 27.719                                                        |
| $F(000)$                                       | 2466.0                                                        | 2520.0                                                        | 2574.0                                                        |
| $2\theta$ range for data collection/ $^\circ$  | 4.646 to 72.664                                               | 4.626 to 54.932                                               | 4.594 to 54.96                                                |
| Index ranges                                   | $-29 \leq h \leq 29, -29 \leq k \leq 29, -12 \leq l \leq 12$  | $-22 \leq h \leq 22, -22 \leq k \leq 22, -10 \leq l \leq 10$  | $-22 \leq h \leq 23, -23 \leq k \leq 23, -10 \leq l \leq 10$  |
| Independent reflections                        | 7002 [ $R_{\text{int}} = 0.0884, R_{\text{sigma}} = 0.0534$ ] | 3406 [ $R_{\text{int}} = 0.0605, R_{\text{sigma}} = 0.0399$ ] | 3453 [ $R_{\text{int}} = 0.0575, R_{\text{sigma}} = 0.0385$ ] |
| Data/restraints/parameters                     | 7002/0/153                                                    | 3406/0/152                                                    | 3453/0/154                                                    |
| Goodness-of-fit on $F^2$                       | 1.081                                                         | 1.023                                                         | 1.022                                                         |
| $R_1, wR_2$ [ $I > 2\sigma(I)$ ] <sup>a)</sup> | 0.0389, 0.0989                                                | 0.0243, 0.0574                                                | 0.0261, 0.0618                                                |
| $R_1, wR_2$ [all data] <sup>a)</sup>           | 0.0537, 0.1089                                                | 0.0394, 0.0647                                                | 0.0338, 0.0670                                                |
| Largest diff. peak/hole/ $e \text{\AA}^{-3}$   | 1.84/-1.74                                                    | 1.51/-0.88                                                    | 1.73/-1.32                                                    |
| Flack parameter                                | 0.028(9)                                                      | -0.013(14)                                                    | 0.018(12)                                                     |

<sup>a)</sup> $R_1 = F_o - F_c/F_o$  and  $wR_2 = [w(F_o^2 - F_c^2)^2/wF_o^4]^{1/2}$  for  $F_o^2 > 2\sigma(F_o^2)$

Table S2. Atomic coordinates ( $\times 10^4$ ), equivalent isotropic displacement parameters ( $\text{\AA}^2 \times 10^3$ ) and bond valence calculations for  $\text{CaMg}_6\text{Ga}_6\text{Se}_{16}$ .

| Atom              | Wyckoff    | $x$        | $y$        | $z$        | U(eq)    | BVS <sup>a)</sup> |
|-------------------|------------|------------|------------|------------|----------|-------------------|
| Ca1               | 1 <i>e</i> | 6666.67    | 3333.33    | 10000      | 14.2(10) | 1.64              |
| Ca2               | 1 <i>a</i> | 10000      | 10000      | 10000      | 15.1(12) | 1.62              |
| Ca3               | 1 <i>c</i> | 3333.33    | 6666.67    | 10000      | 25.7(16) | 1.63              |
| Mg1               | 3 <i>k</i> | 10436(4)   | 8017(3)    | 5000       | 7.2(9)   | 1.95              |
| Mg2               | 3 <i>j</i> | 7494(4)    | 9485(4)    | 10000      | 9.3(10)  | 2.05              |
| Mg3               | 3 <i>k</i> | 3803(4)    | 4728(4)    | 5000       | 10.5(10) | 1.90              |
| Mg4               | 3 <i>j</i> | 3873(4)    | 4732(4)    | 10000      | 9.2(9)   | 1.90              |
| Mg5               | 3 <i>k</i> | 4300(4)    | 1342(4)    | 5000       | 9.1(9)   | 2.07              |
| Mg6               | 3 <i>j</i> | 4200(5)    | 1340(5)    | 10000      | 14.8(11) | 2.10              |
| Ga1               | 6 <i>l</i> | 8128.8(8)  | 7804.2(8)  | 7484.4(14) | 7.2(2)   | 2.95              |
| Ga2               | 6 <i>l</i> | 5592.1(8)  | 7020.2(8)  | 7493.0(14) | 6.8(2)   | 3.06              |
| Ga3               | 6 <i>l</i> | 4705.4(8)  | 3572.1(7)  | 7493.5(16) | 6.5(2)   | 3.00              |
| Se1               | 6 <i>l</i> | 8421.2(8)  | 9264.6(7)  | 7545.6(16) | 9.7(2)   | 1.93              |
| Se2               | 3 <i>j</i> | 5893.2(12) | 7952.6(13) | 10000      | 8.1(3)   | 2.02              |
| Se3               | 3 <i>j</i> | 8726.9(13) | 7431.8(11) | 10000      | 8.0(3)   | 1.88              |
| Se4               | 3 <i>k</i> | 8670.5(13) | 7360.3(11) | 5000       | 7.1(3)   | 1.93              |
| Se5               | 6 <i>l</i> | 6657.5(7)  | 6541.9(7)  | 7506.5(19) | 6.44(18) | 2.19              |
| Se6               | 6 <i>l</i> | 4111.0(8)  | 5875.0(9)  | 7524.3(14) | 9.38(18) | 1.92              |
| Se7               | 3 <i>k</i> | 2008.7(15) | 4038.3(12) | 5000       | 8.3(3)   | 2.02              |
| Se8               | 6 <i>l</i> | 3249.0(7)  | 3368.0(8)  | 7507.1(18) | 6.45(19) | 1.86              |
| Se9               | 3 <i>k</i> | 5281.3(11) | 4551.9(11) | 5000       | 7.2(3)   | 2.00              |
| Se10              | 3 <i>j</i> | 5335.4(12) | 4543.2(11) | 10000      | 7.4(3)   | 1.90              |
| Se11              | 6 <i>l</i> | 5093.8(9)  | 2473.6(8)  | 7536(2)    | 8.63(18) | 2.00              |
| GII <sup>b)</sup> |            |            |            | 0.155      |          |                   |

<sup>a)</sup>The bond valence sum is calculated by bond-valence theory ( $S_{ij} = \exp[(R_0 - R)/B]$ , where  $R$  is an empirical constant,  $R_0$  is the length of bond I (in angstroms), and  $B = 0.37$ ).

<sup>b)</sup>The global instability index (GII) calculated using

$$G = \sqrt{\frac{\sum_{i=1}^n (BVS - v_i)}{N}}$$

where  $N$  is the number of atoms in the formula unit. The GII is calculated as 0.155 which is lower than 0.2 indicating the rationality of the structure from this side.



Table S3 Selected bond lengths [Å] for CaMg<sub>6</sub>Ga<sub>6</sub>Se<sub>16</sub>.

| Atom | Atom              | Length     | Atom | Atom               | Length     |
|------|-------------------|------------|------|--------------------|------------|
| Ca1  | Se11 <sup>1</sup> | 3.0612(15) | Mg3  | Se8 <sup>16</sup>  | 2.844(5)   |
| Ca1  | Se11              | 3.0612(15) | Mg3  | Se8                | 2.844(5)   |
| Ca1  | Se11 <sup>5</sup> | 3.0612(15) | Mg3  | Se9                | 2.762(8)   |
| Ca1  | Se11 <sup>3</sup> | 3.0612(15) | Mg4  | Se2 <sup>11</sup>  | 2.798(7)   |
| Ca1  | Se11 <sup>4</sup> | 3.0612(15) | Mg4  | Se6                | 2.652(4)   |
| Ca1  | Se11 <sup>2</sup> | 3.0612(15) | Mg4  | Se6 <sup>1</sup>   | 2.652(4)   |
| Ca2  | Se1 <sup>6</sup>  | 3.0640(13) | Mg4  | Se8 <sup>1</sup>   | 2.836(4)   |
| Ca2  | Se1 <sup>8</sup>  | 3.0640(13) | Mg4  | Se8                | 2.836(4)   |
| Ca2  | Se1 <sup>9</sup>  | 3.0640(12) | Mg4  | Se10               | 2.747(8)   |
| Ca2  | Se1 <sup>7</sup>  | 3.0640(12) | Mg5  | Se4 <sup>3</sup>   | 2.883(6)   |
| Ca2  | Se1 <sup>1</sup>  | 3.0640(13) | Mg5  | Se5 <sup>17</sup>  | 2.727(5)   |
| Ca2  | Se1               | 3.0640(12) | Mg5  | Se5 <sup>3</sup>   | 2.727(5)   |
| Ca3  | Se6 <sup>10</sup> | 3.0609(12) | Mg5  | Se9 <sup>3</sup>   | 2.717(6)   |
| Ca3  | Se6 <sup>1</sup>  | 3.0609(12) | Mg5  | Se11 <sup>16</sup> | 2.640(5)   |
| Ca3  | Se6 <sup>11</sup> | 3.0609(12) | Mg5  | Se11               | 2.640(5)   |
| Ca3  | Se6 <sup>12</sup> | 3.0609(12) | Mg6  | Se3 <sup>3</sup>   | 2.820(7)   |
| Ca3  | Se6               | 3.0609(12) | Mg6  | Se5 <sup>3</sup>   | 2.691(5)   |
| Ca3  | Se6 <sup>13</sup> | 3.0609(12) | Mg6  | Se5 <sup>4</sup>   | 2.691(5)   |
| Mg1  | Se1 <sup>7</sup>  | 2.668(4)   | Mg6  | Se10 <sup>3</sup>  | 2.809(7)   |
| Mg1  | Se1 <sup>14</sup> | 2.668(4)   | Mg6  | Se11               | 2.638(5)   |
| Mg1  | Se4               | 2.712(6)   | Mg6  | Se11 <sup>1</sup>  | 2.638(5)   |
| Mg1  | Se7 <sup>5</sup>  | 2.816(7)   | Ga1  | Se1                | 2.3476(15) |
| Mg1  | Se8 <sup>15</sup> | 2.791(4)   | Ga1  | Se3                | 2.454(2)   |
| Mg1  | Se8 <sup>5</sup>  | 2.791(4)   | Ga1  | Se4                | 2.442(2)   |
| Mg2  | Se1 <sup>1</sup>  | 2.652(4)   | Ga1  | Se5                | 2.4168(15) |
| Mg2  | Se1               | 2.652(4)   | Ga2  | Se2                | 2.4235(19) |
| Mg2  | Se2               | 2.752(8)   | Ga2  | Se5                | 2.3998(15) |
| Mg2  | Se3 <sup>6</sup>  | 2.769(7)   | Ga2  | Se6                | 2.3591(15) |
| Mg2  | Se8 <sup>12</sup> | 2.752(4)   | Ga2  | Se7 <sup>12</sup>  | 2.420(2)   |
| Mg2  | Se8 <sup>10</sup> | 2.752(4)   | Ga3  | Se8                | 2.3942(16) |
| Mg3  | Se6 <sup>16</sup> | 2.663(5)   | Ga3  | Se9                | 2.4448(17) |
| Mg3  | Se6               | 2.663(5)   | Ga3  | Se10               | 2.4550(17) |
| Mg3  | Se7               | 2.745(7)   | Ga3  | Se11               | 2.3417(14) |

<sup>1</sup>+X,+Y,2-Z; <sup>2</sup>1+Y-X,1-X,2-Z; <sup>3</sup>1-Y,+X-Y,+Z; <sup>4</sup>1-Y,+X-Y,2-Z; <sup>5</sup>1+Y-X,1-X,+Z; <sup>6</sup>1+Y-X,2-X,+Z;  
<sup>7</sup>2-Y,1+X-Y,+Z; <sup>8</sup>1+Y-X,2-X,2-Z; <sup>9</sup>2-Y,1+X-Y,2-Z; <sup>10</sup>1-Y,1+X-Y,2-Z; <sup>11</sup>+Y-X,1-X,+Z; <sup>12</sup>1-Y,1+X-Y,+Z;  
<sup>13</sup>+Y-X,1-X,2-Z; <sup>14</sup>2-Y,1+X-Y,1-Z; <sup>15</sup>1+Y-X,1-X,1-Z; <sup>16</sup>+X,+Y,1-Z; <sup>17</sup>1-Y,+X-Y,1-Z

Table S4. Selected bond angles [°] for CaMg<sub>6</sub>Ga<sub>6</sub>Se<sub>16</sub>.

| Atom              | Atom | Atom              | Angle       | Atom               | Atom | Atom              | Angle      |
|-------------------|------|-------------------|-------------|--------------------|------|-------------------|------------|
| Se1 <sup>2</sup>  | Ca1  | Se1 <sup>3</sup>  | 77.29(6)    | Se6                | Mg3  | Se7               | 95.1(2)    |
| Se1 <sup>2</sup>  | Ca1  | Se1 <sup>1</sup>  | 85.13(5)    | Se6 <sup>16</sup>  | Mg3  | Se7               | 95.1(2)    |
| Se1 <sup>3</sup>  | Ca1  | Se1 <sup>5</sup>  | 85.13(5)    | Se6                | Mg3  | Se8 <sup>16</sup> | 172.7(3)   |
| Se1 <sup>4</sup>  | Ca1  | Se1 <sup>5</sup>  | 77.29(6)    | Se6 <sup>16</sup>  | Mg3  | Se8 <sup>16</sup> | 89.12(4)   |
| Se1 <sup>2</sup>  | Ca1  | Se1 <sup>5</sup>  | 134.03(2)   | Se6                | Mg3  | Se8               | 89.12(4)   |
| Se1 <sup>1</sup>  | Ca1  | Se11              | 77.29(6)    | Se6 <sup>16</sup>  | Mg3  | Se8               | 172.7(3)   |
| Se1 <sup>1</sup>  | Ca1  | Se1 <sup>4</sup>  | 85.13(5)    | Se6                | Mg3  | Se9               | 103.59(19) |
| Se1 <sup>2</sup>  | Ca1  | Se1 <sup>4</sup>  | 85.13(4)    | Se6 <sup>16</sup>  | Mg3  | Se9               | 103.59(19) |
| Se1 <sup>3</sup>  | Ca1  | Se11              | 85.13(5)    | Se7                | Mg3  | Se8               | 78.30(16)  |
| Se1 <sup>2</sup>  | Ca1  | Se11              | 134.03(2)   | Se7                | Mg3  | Se8 <sup>16</sup> | 78.30(16)  |
| Se1 <sup>4</sup>  | Ca1  | Se11              | 134.03(2)   | Se7                | Mg3  | Se9               | 152.1(3)   |
| Se1 <sup>3</sup>  | Ca1  | Se1 <sup>4</sup>  | 134.03(2)   | Se8 <sup>16</sup>  | Mg3  | Se8               | 86.37(19)  |
| Se1 <sup>5</sup>  | Ca1  | Se11              | 85.13(4)    | Se9                | Mg3  | Se8               | 81.48(18)  |
| Se1 <sup>1</sup>  | Ca1  | Se1 <sup>5</sup>  | 134.03(2)   | Se9                | Mg3  | Se8 <sup>16</sup> | 81.48(18)  |
| Se1 <sup>3</sup>  | Ca1  | Se1 <sup>1</sup>  | 134.03(2)   | Se2 <sup>10</sup>  | Mg4  | Se8 <sup>1</sup>  | 77.59(15)  |
| Se1 <sup>9</sup>  | Ca2  | Se1 <sup>1</sup>  | 85.41(3)    | Se6                | Mg4  | Se2 <sup>10</sup> | 90.89(19)  |
| Se1 <sup>6</sup>  | Ca2  | Se1               | 85.41(3)    | Se6 <sup>1</sup>   | Mg4  | Se2 <sup>10</sup> | 90.89(19)  |
| Se1 <sup>7</sup>  | Ca2  | Se1               | 85.41(3)    | Se6 <sup>1</sup>   | Mg4  | Se6               | 92.8(2)    |
| Se1 <sup>1</sup>  | Ca2  | Se1               | 76.91(5)    | Se6 <sup>1</sup>   | Mg4  | Se8               | 168.3(3)   |
| Se1 <sup>8</sup>  | Ca2  | Se1 <sup>9</sup>  | 85.41(3)    | Se6                | Mg4  | Se8               | 89.50(5)   |
| Se1 <sup>7</sup>  | Ca2  | Se1 <sup>9</sup>  | 76.91(5)    | Se6                | Mg4  | Se8 <sup>1</sup>  | 168.3(3)   |
| Se1 <sup>9</sup>  | Ca2  | Se1 <sup>6</sup>  | 133.897(16) | Se6 <sup>1</sup>   | Mg4  | Se8 <sup>1</sup>  | 89.50(5)   |
| Se1 <sup>8</sup>  | Ca2  | Se1 <sup>6</sup>  | 76.91(5)    | Se6 <sup>1</sup>   | Mg4  | Se10              | 106.70(19) |
| Se1 <sup>1</sup>  | Ca2  | Se1 <sup>6</sup>  | 133.897(16) | Se6                | Mg4  | Se10              | 106.70(19) |
| Se1 <sup>8</sup>  | Ca2  | Se1 <sup>7</sup>  | 133.897(16) | Se8                | Mg4  | Se8 <sup>1</sup>  | 86.01(18)  |
| Se1 <sup>8</sup>  | Ca2  | Se1               | 133.898(16) | Se10               | Mg4  | Se2 <sup>10</sup> | 154.1(3)   |
| Se1 <sup>7</sup>  | Ca2  | Se1 <sup>6</sup>  | 85.41(3)    | Se10               | Mg4  | Se8               | 83.55(18)  |
| Se1 <sup>8</sup>  | Ca2  | Se1 <sup>1</sup>  | 85.41(3)    | Se10               | Mg4  | Se8 <sup>1</sup>  | 83.55(18)  |
| Se1 <sup>9</sup>  | Ca2  | Se1               | 133.896(16) | Se5 <sup>17</sup>  | Mg5  | Se4 <sup>3</sup>  | 80.77(16)  |
| Se1 <sup>7</sup>  | Ca2  | Se1 <sup>1</sup>  | 133.897(16) | Se5 <sup>3</sup>   | Mg5  | Se4 <sup>3</sup>  | 80.77(16)  |
| Se6 <sup>10</sup> | Ca3  | Se6 <sup>11</sup> | 134.176(15) | Se5 <sup>17</sup>  | Mg5  | Se5 <sup>3</sup>  | 91.0(2)    |
| Se6 <sup>10</sup> | Ca3  | Se6 <sup>1</sup>  | 134.176(15) | Se9 <sup>3</sup>   | Mg5  | Se4 <sup>3</sup>  | 158.7(3)   |
| Se6 <sup>11</sup> | Ca3  | Se6               | 134.176(16) | Se9 <sup>3</sup>   | Mg5  | Se5 <sup>3</sup>  | 84.35(16)  |
| Se6 <sup>12</sup> | Ca3  | Se6               | 84.80(3)    | Se9 <sup>3</sup>   | Mg5  | Se5 <sup>17</sup> | 84.35(16)  |
| Se6 <sup>13</sup> | Ca3  | Se6 <sup>1</sup>  | 84.80(3)    | Se11 <sup>16</sup> | Mg5  | Se4 <sup>3</sup>  | 99.41(16)  |
| Se6 <sup>12</sup> | Ca3  | Se6 <sup>1</sup>  | 134.176(16) | Se11               | Mg5  | Se4 <sup>3</sup>  | 99.41(16)  |
| Se6 <sup>10</sup> | Ca3  | Se6 <sup>12</sup> | 84.80(3)    | Se11               | Mg5  | Se5 <sup>17</sup> | 177.2(2)   |
| Se6 <sup>10</sup> | Ca3  | Se6 <sup>13</sup> | 77.73(4)    | Se11 <sup>16</sup> | Mg5  | Se5 <sup>3</sup>  | 177.2(2)   |
| Se6 <sup>11</sup> | Ca3  | Se6 <sup>12</sup> | 77.73(4)    | Se11               | Mg5  | Se5 <sup>3</sup>  | 86.27(4)   |
| Se6 <sup>11</sup> | Ca3  | Se6 <sup>1</sup>  | 84.80(3)    | Se11 <sup>16</sup> | Mg5  | Se5 <sup>17</sup> | 86.27(4)   |

|                   |     |                   |             |                    |     |                    |            |
|-------------------|-----|-------------------|-------------|--------------------|-----|--------------------|------------|
| Se6 <sup>10</sup> | Ca3 | Se6               | 84.80(3)    | Se11 <sup>16</sup> | Mg5 | Se9 <sup>3</sup>   | 94.72(18)  |
| Se6 <sup>11</sup> | Ca3 | Se6 <sup>13</sup> | 84.80(3)    | Se11               | Mg5 | Se9 <sup>3</sup>   | 94.72(18)  |
| Se6 <sup>13</sup> | Ca3 | Se6 <sup>12</sup> | 134.176(15) | Se11               | Mg5 | Se11 <sup>16</sup> | 96.4(2)    |
| Se6 <sup>13</sup> | Ca3 | Se6               | 134.176(15) | Se5 <sup>2</sup>   | Mg6 | Se3 <sup>3</sup>   | 84.26(19)  |
| Se6               | Ca3 | Se6 <sup>1</sup>  | 77.73(4)    | Se5 <sup>3</sup>   | Mg6 | Se3 <sup>3</sup>   | 84.26(19)  |
| Se1 <sup>7</sup>  | Mg1 | Se1 <sup>14</sup> | 95.49(19)   | Se5 <sup>3</sup>   | Mg6 | Se5 <sup>2</sup>   | 92.0(2)    |
| Se1 <sup>7</sup>  | Mg1 | Se4               | 94.16(18)   | Se5 <sup>2</sup>   | Mg6 | Se10 <sup>3</sup>  | 82.91(17)  |
| Se1 <sup>14</sup> | Mg1 | Se4               | 94.16(18)   | Se5 <sup>3</sup>   | Mg6 | Se10 <sup>3</sup>  | 82.91(17)  |
| Se1 <sup>7</sup>  | Mg1 | Se7 <sup>5</sup>  | 100.78(16)  | Se10 <sup>3</sup>  | Mg6 | Se3 <sup>3</sup>   | 161.5(3)   |
| Se1 <sup>14</sup> | Mg1 | Se7 <sup>5</sup>  | 100.78(16)  | Se11 <sup>1</sup>  | Mg6 | Se3 <sup>3</sup>   | 103.49(18) |
| Se1 <sup>7</sup>  | Mg1 | Se8 <sup>5</sup>  | 88.05(4)    | Se11               | Mg6 | Se3 <sup>3</sup>   | 103.49(18) |
| Se1 <sup>14</sup> | Mg1 | Se8 <sup>15</sup> | 88.05(4)    | Se11 <sup>1</sup>  | Mg6 | Se5 <sup>2</sup>   | 87.03(5)   |
| Se1 <sup>14</sup> | Mg1 | Se8 <sup>5</sup>  | 176.43(19)  | Se11 <sup>1</sup>  | Mg6 | Se5 <sup>3</sup>   | 172.0(3)   |
| Se1 <sup>7</sup>  | Mg1 | Se8 <sup>15</sup> | 176.43(19)  | Se11               | Mg6 | Se5 <sup>2</sup>   | 172.0(3)   |
| Se4               | Mg1 | Se7 <sup>5</sup>  | 157.7(2)    | Se11               | Mg6 | Se5 <sup>3</sup>   | 87.03(5)   |
| Se4               | Mg1 | Se8 <sup>15</sup> | 86.07(16)   | Se11 <sup>1</sup>  | Mg6 | Se10 <sup>3</sup>  | 89.12(19)  |
| Se4               | Mg1 | Se8 <sup>5</sup>  | 86.07(16)   | Se11               | Mg6 | Se10 <sup>3</sup>  | 89.12(19)  |
| Se8 <sup>15</sup> | Mg1 | Se7 <sup>5</sup>  | 78.00(18)   | Se11               | Mg6 | Se11 <sup>1</sup>  | 92.9(3)    |
| Se8 <sup>5</sup>  | Mg1 | Se7 <sup>5</sup>  | 78.00(18)   | Se1                | Ga1 | Se3                | 112.67(7)  |
| Se8 <sup>15</sup> | Mg1 | Se8 <sup>5</sup>  | 88.41(17)   | Se1                | Ga1 | Se4                | 117.12(7)  |
| Se1 <sup>1</sup>  | Mg2 | Se1               | 91.88(19)   | Se1                | Ga1 | Se5                | 123.39(6)  |
| Se1 <sup>1</sup>  | Mg2 | Se2               | 104.92(19)  | Se4                | Ga1 | Se3                | 104.89(7)  |
| Se1               | Mg2 | Se2               | 104.92(19)  | Se5                | Ga1 | Se3                | 98.79(7)   |
| Se1               | Mg2 | Se3 <sup>6</sup>  | 89.3(2)     | Se5                | Ga1 | Se4                | 96.90(7)   |
| Se1 <sup>1</sup>  | Mg2 | Se3 <sup>6</sup>  | 89.3(2)     | Se5                | Ga2 | Se2                | 106.69(7)  |
| Se1               | Mg2 | Se8 <sup>12</sup> | 89.18(4)    | Se5                | Ga2 | Se7 <sup>12</sup>  | 104.90(7)  |
| Se1 <sup>1</sup>  | Mg2 | Se8 <sup>11</sup> | 89.18(4)    | Se6                | Ga2 | Se2                | 109.97(7)  |
| Se1               | Mg2 | Se8 <sup>11</sup> | 174.7(3)    | Se6                | Ga2 | Se5                | 114.86(5)  |
| Se1 <sup>1</sup>  | Mg2 | Se8 <sup>12</sup> | 174.7(3)    | Se6                | Ga2 | Se7 <sup>12</sup>  | 113.31(7)  |
| Se2               | Mg2 | Se3 <sup>6</sup>  | 159.3(2)    | Se7 <sup>12</sup>  | Ga2 | Se2                | 106.54(6)  |
| Se2               | Mg2 | Se8 <sup>11</sup> | 79.79(19)   | Se8                | Ga3 | Se9                | 98.24(7)   |
| Se2               | Mg2 | Se8 <sup>12</sup> | 79.79(19)   | Se8                | Ga3 | Se10               | 100.19(7)  |
| Se8 <sup>11</sup> | Mg2 | Se3 <sup>6</sup>  | 85.51(17)   | Se9                | Ga3 | Se10               | 104.78(6)  |
| Se8 <sup>12</sup> | Mg2 | Se3 <sup>6</sup>  | 85.51(17)   | Se11               | Ga3 | Se8                | 127.20(6)  |
| Se8 <sup>12</sup> | Mg2 | Se8 <sup>11</sup> | 89.29(18)   | Se11               | Ga3 | Se9                | 113.67(9)  |
| Se6 <sup>16</sup> | Mg3 | Se6               | 94.8(2)     | Se11               | Ga3 | Se10               | 110.04(8)  |

<sup>1</sup>+X,+Y,2-Z; <sup>2</sup>1-Y,+X-Y,2-Z; <sup>3</sup>1-Y,+X-Y,+Z; <sup>4</sup>1+Y-X,1-X,2-Z; <sup>5</sup>1+Y-X,1-X,+Z; <sup>6</sup>1+Y-X,2-X,+Z;  
<sup>7</sup>2-Y,1+X-Y,+Z; <sup>8</sup>1+Y-X,2-X,2-Z; <sup>9</sup>2-Y,1+X-Y,2-Z; <sup>10</sup>+Y-X,1-X,+Z; <sup>11</sup>1-Y,1+X-Y,2-Z; <sup>12</sup>1-  
Y,1+X-Y,+Z; <sup>13</sup>+Y-X,1-X,2-Z; <sup>14</sup>2-Y,1+X-Y,1-Z; <sup>15</sup>1+Y-X,1-X,1-Z; <sup>16</sup>+X,+Y,1-Z; <sup>17</sup>1-Y,+X-Y,1-  
Z; <sup>18</sup>+Y-X,1-X,1-Z

Table S5. Anisotropic displacement parameters ( $\text{\AA}^2 \times 10^3$ ) for  $\text{CaMg}_6\text{Ga}_6\text{Se}_{16}$ .

| Atom | U <sub>11</sub> | U <sub>22</sub> | U <sub>33</sub> | U <sub>23</sub> | U <sub>13</sub> | U <sub>12</sub> |
|------|-----------------|-----------------|-----------------|-----------------|-----------------|-----------------|
| Ca1  | 15.9(15)        | 15.9(15)        | 11(2)           | 0               | 0               | 7.9(8)          |
| Ca2  | 17.6(17)        | 17.6(17)        | 10(3)           | 0               | 0               | 8.8(9)          |
| Ca3  | 21(2)           | 21(2)           | 35(4)           | 0               | 0               | 10.4(11)        |
| Mg1  | 8(2)            | 9(2)            | 6(2)            | 0               | 0               | 4.6(19)         |
| Mg2  | 13(2)           | 15(2)           | 5(2)            | 0               | 0               | 10(2)           |
| Mg3  | 14(2)           | 10(2)           | 5(2)            | 0               | 0               | 5(2)            |
| Mg4  | 13(2)           | 8(2)            | 4.8(19)         | 0               | 0               | 4.3(19)         |
| Mg5  | 9(2)            | 8(2)            | 9(2)            | 0               | 0               | 4(2)            |
| Mg6  | 14(3)           | 12(3)           | 16(2)           | 0               | 0               | 4(3)            |
| Ga1  | 9.6(5)          | 6.7(5)          | 5.4(4)          | -0.5(4)         | -0.3(4)         | 4.2(4)          |
| Ga2  | 7.1(5)          | 7.2(4)          | 6.0(4)          | 0.5(3)          | 0.9(4)          | 3.4(4)          |
| Ga3  | 7.5(4)          | 6.1(4)          | 6.1(4)          | -0.2(4)         | 0.0(4)          | 3.5(3)          |
| Se1  | 12.5(5)         | 7.3(4)          | 10.2(5)         | -1.8(4)         | -1.0(4)         | 5.6(4)          |
| Se2  | 10.8(8)         | 5.2(7)          | 7.3(6)          | 0               | 0               | 3.2(6)          |
| Se3  | 7.4(7)          | 11.8(8)         | 5.7(5)          | 0               | 0               | 5.5(6)          |
| Se4  | 9.1(7)          | 8.5(7)          | 5.6(5)          | 0               | 0               | 5.8(6)          |
| Se5  | 6.2(4)          | 5.8(4)          | 7.8(4)          | -0.1(3)         | 0.1(3)          | 3.3(3)          |
| Se6  | 6.9(4)          | 8.8(4)          | 10.1(4)         | -0.3(5)         | 0.9(5)          | 2.2(4)          |
| Se7  | 11.9(8)         | 10.5(7)         | 6.7(6)          | 0               | 0               | 8.6(6)          |
| Se8  | 5.1(4)          | 6.2(4)          | 7.4(4)          | 0.3(3)          | 0.4(3)          | 2.4(3)          |
| Se9  | 3.7(6)          | 8.1(7)          | 6.2(5)          | 0               | 0               | 0.3(5)          |
| Se10 | 7.9(7)          | 5.9(6)          | 5.4(5)          | 0               | 0               | 1.3(5)          |
| Se11 | 11.6(4)         | 7.2(4)          | 8.2(4)          | -1.0(4)         | -1.8(4)         | 5.5(4)          |

Table S6. Atomic coordinates ( $\times 10^4$ ), equivalent isotropic displacement parameters ( $\text{\AA}^2 \times 10^3$ ) and bond valence calculations for  $\text{SrMg}_6\text{Ga}_6\text{Se}_{16}$ .

| Atom              | Wyckoff    | <i>x</i>   | <i>y</i>   | <i>z</i> | U(eq)    | BVS <sup>a)</sup> |
|-------------------|------------|------------|------------|----------|----------|-------------------|
| Sr1               | 1 <i>f</i> | 6666.67    | 3333.33    | 10000    | 27.3(12) | 1.87              |
| Sr2               | 1 <i>d</i> | 3333.33    | 6666.67    | 10000    | 26.3(12) | 1.86              |
| Sr3               | 1 <i>b</i> | 0          | 0          | 10000    | 26.9(12) | 1.84              |
| Mg1               | 3 <i>k</i> | 4669(8)    | 3853(10)   | 10000    | 25(3)    | 1.90              |
| Mg2               | 3 <i>j</i> | 5844(9)    | 8617(8)    | 10000    | 23(3)    | 1.97              |
| Mg3               | 3 <i>k</i> | 5759(10)   | 8611(8)    | 5000     | 24(2)    | 2.02              |
| Mg4               | 3 <i>j</i> | 4641(8)    | 3780(11)   | 5000     | 24(3)    | 2.02              |
| Mg5               | 3 <i>j</i> | 2506(10)   | 512(9)     | 10000    | 26(3)    | 2.12              |
| Mg6               | 3 <i>k</i> | 2415(9)    | 393(8)     | 5000     | 21(2)    | 2.06              |
| Ga1               | 6 <i>l</i> | 6977.2(12) | 5519.8(12) | 7476(5)  | 19.9(5)  | 2.95              |
| Ga2               | 6 <i>l</i> | 5238.0(11) | 6310.7(11) | 7479(5)  | 18.9(4)  | 3.00              |
| Ga3               | 6 <i>l</i> | 1963.5(12) | 2199.8(12) | 7477(4)  | 18.8(4)  | 3.06              |
| Se1               | 6 <i>l</i> | 5785.7(11) | 4088.4(11) | 7512(4)  | 20.9(4)  | 2.02              |
| Se2               | 3 <i>j</i> | 7966(3)    | 5948(3)    | 5000     | 18.9(8)  | 2.04              |
| Se3               | 3 <i>k</i> | 7932(3)    | 5860(3)    | 10000    | 20.7(8)  | 2.19              |
| Se4               | 3 <i>k</i> | 6773.8(10) | 6778.9(10) | 7509(5)  | 18.6(3)  | 1.94              |
| Se5               | 6 <i>l</i> | 4637(3)    | 5361(3)    | 5000     | 18.8(9)  | 2.03              |
| Se6               | 6 <i>l</i> | 4962.3(12) | 7485.3(12) | 7504(5)  | 20.9(3)  | 1.90              |
| Se7               | 3 <i>j</i> | 4586(3)    | 5392(3)    | 10000    | 19.5(9)  | 1.89              |
| Se8               | 3 <i>j</i> | 3409.7(11) | 3451.2(11) | 7508(5)  | 18.4(3)  | 1.97              |
| Se9               | 3 <i>k</i> | 1628.4(12) | 734.5(11)  | 7509(5)  | 20.9(3)  | 1.84              |
| Se10              | 6 <i>l</i> | 1320(3)    | 2510(3)    | 10000    | 18.2(8)  | 2.07              |
| Se11              | 3 <i>k</i> | 1373(3)    | 2590(3)    | 5000     | 19.2(8)  | 1.86              |
| GII <sup>b)</sup> |            |            |            | 0.096    |          |                   |

<sup>a)</sup>The bond valence sum is calculated by bond-valence theory ( $S_{ij} = \exp[(R_0 - R)/B]$ , where *R* is an empirical constant, *R*<sub>0</sub> is the length of bond I (in angstroms), and *B*= 0.37).

<sup>b)</sup>The global instability index (GII) calculated using

$$G = \sqrt{\frac{\sum_{i=1}^n (BVS - v_i)}{N}}$$

where *N* is the number of atoms in the formula unit. The GII is calculated as 0.096 which is lower than 0.2 indicating the rationality of the structure from this side.

Table S7. Selected bond lengths [ $\text{\AA}$ ] for  $\text{SrMg}_6\text{Ga}_6\text{Se}_{16}$ .

| Atom | Atom              | Length    | Atom | Atom               | Length    |
|------|-------------------|-----------|------|--------------------|-----------|
| Sr1  | Se1 <sup>2</sup>  | 3.152(3)  | Mg3  | Se6 <sup>5</sup>   | 2.759(9)  |
| Sr1  | Se1 <sup>3</sup>  | 3.152(3)  | Mg3  | Se6                | 2.759(9)  |
| Sr1  | Se1 <sup>4</sup>  | 3.152(3)  | Mg3  | Se11               | 2.792(15) |
| Sr1  | Se1 <sup>5</sup>  | 3.152(3)  | Mg4  | Se2                | 2.784(17) |
| Sr1  | Se1 <sup>1</sup>  | 3.152(3)  | Mg4  | Se5                | 2.661(9)  |
| Sr1  | Se1               | 3.152(3)  | Mg4  | Se5 <sup>14</sup>  | 2.661(9)  |
| Sr2  | Se10 <sup>7</sup> | 3.152(3)  | Mg4  | Se6 <sup>14</sup>  | 2.752(9)  |
| Sr2  | Se10 <sup>8</sup> | 3.152(3)  | Mg4  | Se6                | 2.752(9)  |
| Sr2  | Se10 <sup>9</sup> | 3.152(3)  | Mg4  | Se7                | 2.739(16) |
| Sr2  | Se10              | 3.152(3)  | Mg5  | Se3 <sup>16</sup>  | 2.702(11) |
| Sr2  | Se10 <sup>5</sup> | 3.152(3)  | Mg5  | Se3 <sup>11</sup>  | 2.702(11) |
| Sr2  | Se10 <sup>6</sup> | 3.152(3)  | Mg5  | Se7                | 2.877(14) |
| Sr3  | Se5 <sup>5</sup>  | 3.159(2)  | Mg5  | Se8 <sup>7</sup>   | 2.748(13) |
| Sr3  | Se5 <sup>12</sup> | 3.159(2)  | Mg5  | Se10               | 2.630(11) |
| Sr3  | Se5 <sup>11</sup> | 3.159(2)  | Mg5  | Se10 <sup>14</sup> | 2.630(11) |
| Sr3  | Se5 <sup>10</sup> | 3.159(2)  | Mg6  | Se3 <sup>13</sup>  | 2.702(11) |
| Sr3  | Se5 <sup>13</sup> | 3.159(2)  | Mg6  | Se3 <sup>11</sup>  | 2.702(11) |
| Sr3  | Se5               | 3.159(2)  | Mg6  | Se9 <sup>7</sup>   | 2.883(15) |
| Mg1  | Se1 <sup>5</sup>  | 2.654(9)  | Mg6  | Se10               | 2.627(11) |
| Mg1  | Se1               | 2.654(9)  | Mg6  | Se10 <sup>5</sup>  | 2.627(11) |
| Mg1  | Se4 <sup>1</sup>  | 2.827(15) | Mg6  | Se11               | 2.814(16) |
| Mg1  | Se6 <sup>1</sup>  | 2.819(10) | Ga1  | Se3                | 2.419(2)  |
| Mg1  | Se6 <sup>4</sup>  | 2.819(10) | Ga1  | Se5                | 2.340(2)  |
| Mg1  | Se9 <sup>1</sup>  | 2.744(16) | Ga1  | Se7 <sup>10</sup>  | 2.447(5)  |
| Mg2  | Se1               | 2.628(9)  | Ga1  | Se11 <sup>10</sup> | 2.454(5)  |
| Mg2  | Se1 <sup>14</sup> | 2.628(9)  | Ga2  | Se6                | 2.394(3)  |
| Mg2  | Se2 <sup>1</sup>  | 2.754(16) | Ga2  | Se8                | 2.444(4)  |
| Mg2  | Se6 <sup>15</sup> | 2.839(10) | Ga2  | Se9                | 2.459(4)  |
| Mg2  | Se6 <sup>1</sup>  | 2.839(10) | Ga2  | Se10               | 2.342(2)  |
| Mg2  | Se8 <sup>1</sup>  | 2.767(17) | Ga3  | Se1                | 2.350(2)  |
| Mg3  | Se4               | 2.787(15) | Ga3  | Se2                | 2.420(4)  |
| Mg3  | Se5 <sup>5</sup>  | 2.637(9)  | Ga3  | Se3                | 2.403(2)  |
| Mg3  | Se5               | 2.637(9)  | Ga3  | Se4                | 2.431(4)  |

<sup>1</sup>1-Y,+X-Y,+Z; <sup>2</sup>1+Y-X,1-X,+Z; <sup>3</sup>1+Y-X,1-X,1-Z; <sup>4</sup>1-Y,+X-Y,1-Z; <sup>5</sup>X,+Y,1-Z; <sup>6</sup>1-Y,1+X-Y,+Z;  
<sup>7</sup>+Y-X,1-X,+Z; <sup>8</sup>1-Y,1+X-Y,1-Z; <sup>9</sup>+Y-X,1-X,1-Z; <sup>10</sup>+Y-X,-X,+Z; <sup>11</sup>-Y,+X-Y,+Z; <sup>12</sup>+Y-X,-X,1-Z;  
<sup>13</sup>-Y,+X-Y,1-Z; <sup>14</sup>+X,+Y,-Z; <sup>15</sup>1-Y,+X-Y,-Z; <sup>16</sup>-Y,+X-Y,-Z

Table S8. Selected bond angles [°] for SrMg<sub>6</sub>Ga<sub>6</sub>Se<sub>16</sub>.

| Atom              | Atom | Atom              | Angle     | Atom               | Atom | Atom              | Angle    |
|-------------------|------|-------------------|-----------|--------------------|------|-------------------|----------|
| Se1 <sup>2</sup>  | Sr1  | Se1 <sup>3</sup>  | 133.56(4) | Se5                | Mg3  | Se4               | 104.2(4) |
| Se1 <sup>2</sup>  | Sr1  | Se1 <sup>1</sup>  | 86.13(9)  | Se5 <sup>4</sup>   | Mg3  | Se5               | 94.3(4)  |
| Se1               | Sr1  | Se1 <sup>2</sup>  | 86.13(9)  | Se5                | Mg3  | Se6 <sup>4</sup>  | 174.7(6) |
| Se1 <sup>4</sup>  | Sr1  | Se1 <sup>2</sup>  | 133.56(4) | Se5                | Mg3  | Se6               | 88.08(9) |
| Se1 <sup>3</sup>  | Sr1  | Se1 <sup>1</sup>  | 75.92(12) | Se5 <sup>4</sup>   | Mg3  | Se6 <sup>4</sup>  | 88.08(9) |
| Se1               | Sr1  | Se1 <sup>4</sup>  | 75.91(12) | Se5 <sup>4</sup>   | Mg3  | Se6               | 174.7(6) |
| Se1               | Sr1  | Se1 <sup>3</sup>  | 133.56(4) | Se5 <sup>4</sup>   | Mg3  | Se11              | 88.9(4)  |
| Se1               | Sr1  | Se1 <sup>1</sup>  | 86.13(9)  | Se5                | Mg3  | Se11              | 88.9(4)  |
| Se1               | Sr1  | Se1 <sup>5</sup>  | 133.56(4) | Se6 <sup>4</sup>   | Mg3  | Se4               | 79.7(3)  |
| Se1 <sup>5</sup>  | Sr1  | Se1 <sup>3</sup>  | 86.13(9)  | Se6                | Mg3  | Se4               | 79.7(3)  |
| Se1 <sup>4</sup>  | Sr1  | Se1 <sup>3</sup>  | 86.13(9)  | Se6                | Mg3  | Se6 <sup>4</sup>  | 89.2(4)  |
| Se1 <sup>5</sup>  | Sr1  | Se1 <sup>1</sup>  | 133.56(4) | Se6 <sup>4</sup>   | Mg3  | Se11              | 86.4(4)  |
| Se1 <sup>5</sup>  | Sr1  | Se1 <sup>4</sup>  | 86.13(9)  | Se6                | Mg3  | Se11              | 86.4(4)  |
| Se1 <sup>4</sup>  | Sr1  | Se1 <sup>1</sup>  | 133.56(4) | Se5                | Mg4  | Se2               | 100.2(4) |
| Se1 <sup>5</sup>  | Sr1  | Se1 <sup>2</sup>  | 75.91(12) | Se5 <sup>14</sup>  | Mg4  | Se2               | 100.2(4) |
| Se10 <sup>4</sup> | Sr2  | Se10 <sup>9</sup> | 86.22(9)  | Se5 <sup>14</sup>  | Mg4  | Se5               | 94.4(4)  |
| Se10 <sup>9</sup> | Sr2  | Se10 <sup>6</sup> | 75.79(12) | Se5 <sup>14</sup>  | Mg4  | Se6               | 177.9(4) |
| Se10 <sup>7</sup> | Sr2  | Se10              | 86.22(9)  | Se5                | Mg4  | Se6               | 87.75(8) |
| Se10 <sup>9</sup> | Sr2  | Se10              | 133.52(4) | Se5                | Mg4  | Se6 <sup>14</sup> | 177.9(4) |
| Se10 <sup>8</sup> | Sr2  | Se10              | 133.52(4) | Se5 <sup>14</sup>  | Mg4  | Se6 <sup>14</sup> | 87.75(8) |
| Se10 <sup>7</sup> | Sr2  | Se10 <sup>4</sup> | 133.52(4) | Se5 <sup>14</sup>  | Mg4  | Se7               | 92.8(4)  |
| Se10 <sup>4</sup> | Sr2  | Se10 <sup>6</sup> | 133.52(4) | Se5                | Mg4  | Se7               | 92.8(4)  |
| Se10 <sup>8</sup> | Sr2  | Se10 <sup>6</sup> | 133.52(4) | Se6 <sup>14</sup>  | Mg4  | Se2               | 79.4(4)  |
| Se10 <sup>8</sup> | Sr2  | Se10 <sup>4</sup> | 86.22(9)  | Se6                | Mg4  | Se2               | 79.4(4)  |
| Se10 <sup>8</sup> | Sr2  | Se10 <sup>7</sup> | 75.79(12) | Se6                | Mg4  | Se6 <sup>14</sup> | 90.1(4)  |
| Se10 <sup>8</sup> | Sr2  | Se10 <sup>9</sup> | 86.22(9)  | Se7                | Mg4  | Se2               | 160.8(5) |
| Se10 <sup>7</sup> | Sr2  | Se10 <sup>6</sup> | 86.22(9)  | Se7                | Mg4  | Se6               | 87.1(4)  |
| Se10 <sup>7</sup> | Sr2  | Se10 <sup>9</sup> | 133.52(4) | Se7                | Mg4  | Se6 <sup>14</sup> | 87.1(4)  |
| Se10 <sup>4</sup> | Sr2  | Se10              | 75.79(12) | Se3 <sup>16</sup>  | Mg5  | Se3 <sup>10</sup> | 92.4(5)  |
| Se10 <sup>6</sup> | Sr2  | Se10              | 86.22(9)  | Se3 <sup>10</sup>  | Mg5  | Se7               | 82.1(4)  |
| Se5 <sup>4</sup>  | Sr3  | Se5 <sup>10</sup> | 133.41(3) | Se3 <sup>16</sup>  | Mg5  | Se7               | 82.1(4)  |
| Se5               | Sr3  | Se5 <sup>13</sup> | 133.41(3) | Se3 <sup>16</sup>  | Mg5  | Se8 <sup>7</sup>  | 85.0(3)  |
| Se5               | Sr3  | Se5 <sup>10</sup> | 86.46(8)  | Se3 <sup>10</sup>  | Mg5  | Se8 <sup>7</sup>  | 85.0(3)  |
| Se5 <sup>11</sup> | Sr3  | Se5               | 86.46(8)  | Se8 <sup>7</sup>   | Mg5  | Se7               | 161.3(6) |
| Se5 <sup>10</sup> | Sr3  | Se5 <sup>13</sup> | 75.47(10) | Se10               | Mg5  | Se3 <sup>16</sup> | 178.0(5) |
| Se5 <sup>12</sup> | Sr3  | Se5 <sup>10</sup> | 133.41(4) | Se10               | Mg5  | Se3 <sup>10</sup> | 85.98(9) |
| Se5 <sup>4</sup>  | Sr3  | Se5 <sup>13</sup> | 86.45(8)  | Se10 <sup>14</sup> | Mg5  | Se3 <sup>16</sup> | 85.98(9) |
| Se5 <sup>11</sup> | Sr3  | Se5 <sup>12</sup> | 75.47(10) | Se10 <sup>14</sup> | Mg5  | Se3 <sup>10</sup> | 178.0(5) |
| Se5 <sup>11</sup> | Sr3  | Se5 <sup>10</sup> | 86.45(8)  | Se10               | Mg5  | Se7               | 98.8(3)  |
| Se5 <sup>4</sup>  | Sr3  | Se5               | 75.47(10) | Se10 <sup>14</sup> | Mg5  | Se7               | 98.8(3)  |

|                   |     |                   |           |                    |     |                    |            |
|-------------------|-----|-------------------|-----------|--------------------|-----|--------------------|------------|
| Se5 <sup>11</sup> | Sr3 | Se5 <sup>4</sup>  | 133.42(3) | Se10 <sup>14</sup> | Mg5 | Se8 <sup>7</sup>   | 93.8(4)    |
| Se5 <sup>12</sup> | Sr3 | Se5 <sup>13</sup> | 86.45(8)  | Se10               | Mg5 | Se8 <sup>7</sup>   | 93.8(4)    |
| Se5 <sup>11</sup> | Sr3 | Se5 <sup>13</sup> | 133.41(3) | Se10               | Mg5 | Se10 <sup>14</sup> | 95.6(5)    |
| Se5 <sup>12</sup> | Sr3 | Se5 <sup>4</sup>  | 86.46(8)  | Se3 <sup>10</sup>  | Mg6 | Se3 <sup>13</sup>  | 91.5(5)    |
| Se5 <sup>12</sup> | Sr3 | Se5               | 133.42(3) | Se3 <sup>13</sup>  | Mg6 | Se9 <sup>7</sup>   | 82.6(3)    |
| Se1 <sup>4</sup>  | Mg1 | Se1               | 93.8(4)   | Se3 <sup>10</sup>  | Mg6 | Se9 <sup>7</sup>   | 82.6(3)    |
| Se1 <sup>4</sup>  | Mg1 | Se4 <sup>2</sup>  | 90.2(4)   | Se3 <sup>13</sup>  | Mg6 | Se11               | 84.8(4)    |
| Se1               | Mg1 | Se4 <sup>2</sup>  | 90.2(4)   | Se3 <sup>10</sup>  | Mg6 | Se11               | 84.8(4)    |
| Se1 <sup>4</sup>  | Mg1 | Se6 <sup>5</sup>  | 88.54(11) | Se10 <sup>4</sup>  | Mg6 | Se3 <sup>13</sup>  | 86.02(10)  |
| Se1               | Mg1 | Se6 <sup>5</sup>  | 168.0(6)  | Se10               | Mg6 | Se3 <sup>13</sup>  | 170.4(6)   |
| Se1 <sup>4</sup>  | Mg1 | Se6 <sup>2</sup>  | 168.0(6)  | Se10               | Mg6 | Se3 <sup>10</sup>  | 86.02(10)  |
| Se1               | Mg1 | Se6 <sup>2</sup>  | 88.54(11) | Se10 <sup>4</sup>  | Mg6 | Se3 <sup>10</sup>  | 170.4(6)   |
| Se1               | Mg1 | Se9 <sup>2</sup>  | 106.2(4)  | Se10 <sup>4</sup>  | Mg6 | Se9 <sup>7</sup>   | 87.9(4)    |
| Se1 <sup>4</sup>  | Mg1 | Se9 <sup>2</sup>  | 106.2(4)  | Se10               | Mg6 | Se9 <sup>7</sup>   | 87.9(4)    |
| Se6 <sup>5</sup>  | Mg1 | Se4 <sup>2</sup>  | 78.1(4)   | Se10 <sup>4</sup>  | Mg6 | Se10               | 94.9(5)    |
| Se6 <sup>2</sup>  | Mg1 | Se4 <sup>2</sup>  | 78.1(4)   | Se10               | Mg6 | Se11               | 104.2(4)   |
| Se6 <sup>2</sup>  | Mg1 | Se6 <sup>5</sup>  | 86.8(4)   | Se10 <sup>4</sup>  | Mg6 | Se11               | 104.2(4)   |
| Se9 <sup>2</sup>  | Mg1 | Se4 <sup>2</sup>  | 155.6(5)  | Se11               | Mg6 | Se9 <sup>7</sup>   | 161.9(6)   |
| Se9 <sup>2</sup>  | Mg1 | Se6 <sup>5</sup>  | 84.3(3)   | Se3                | Ga1 | Se7 <sup>11</sup>  | 97.73(16)  |
| Se9 <sup>2</sup>  | Mg1 | Se6 <sup>2</sup>  | 84.3(3)   | Se3                | Ga1 | Se11 <sup>11</sup> | 99.48(17)  |
| Se1 <sup>14</sup> | Mg2 | Se1               | 95.5(4)   | Se5                | Ga1 | Se3                | 121.61(10) |
| Se1               | Mg2 | Se2 <sup>2</sup>  | 95.5(4)   | Se5                | Ga1 | Se7 <sup>11</sup>  | 117.27(18) |
| Se1 <sup>14</sup> | Mg2 | Se2 <sup>2</sup>  | 95.5(4)   | Se5                | Ga1 | Se11 <sup>11</sup> | 112.96(19) |
| Se1               | Mg2 | Se6 <sup>2</sup>  | 88.63(10) | Se7 <sup>11</sup>  | Ga1 | Se11 <sup>11</sup> | 104.95(11) |
| Se1 <sup>14</sup> | Mg2 | Se6 <sup>2</sup>  | 172.9(6)  | Se6                | Ga2 | Se8                | 98.93(17)  |
| Se1               | Mg2 | Se6 <sup>15</sup> | 172.9(6)  | Se6                | Ga2 | Se9                | 100.58(16) |
| Se1 <sup>14</sup> | Mg2 | Se6 <sup>15</sup> | 88.63(10) | Se8                | Ga2 | Se9                | 104.89(10) |
| Se1 <sup>14</sup> | Mg2 | Se8 <sup>2</sup>  | 102.6(4)  | Se10               | Ga2 | Se6                | 125.54(10) |
| Se1               | Mg2 | Se8 <sup>2</sup>  | 102.6(4)  | Se10               | Ga2 | Se8                | 114.20(18) |
| Se2 <sup>2</sup>  | Mg2 | Se6 <sup>2</sup>  | 78.4(4)   | Se10               | Ga2 | Se9                | 110.20(17) |
| Se2 <sup>2</sup>  | Mg2 | Se6 <sup>15</sup> | 78.4(4)   | Se1                | Ga3 | Se2                | 113.83(18) |
| Se2 <sup>2</sup>  | Mg2 | Se8 <sup>2</sup>  | 152.9(5)  | Se1                | Ga3 | Se3                | 112.89(9)  |
| Se6 <sup>15</sup> | Mg2 | Se6 <sup>2</sup>  | 86.7(4)   | Se1                | Ga3 | Se4                | 110.01(17) |
| Se8 <sup>2</sup>  | Mg2 | Se6 <sup>15</sup> | 81.9(3)   | Se2                | Ga3 | Se4                | 106.50(10) |
| Se8 <sup>2</sup>  | Mg2 | Se6 <sup>2</sup>  | 81.9(3)   | Se3                | Ga3 | Se2                | 105.88(16) |
| Se4               | Mg3 | Se11              | 160.5(5)  | Se3                | Ga3 | Se4                | 107.31(17) |
| Se5 <sup>4</sup>  | Mg3 | Se4               | 104.2(4)  |                    |     |                    |            |

<sup>1</sup>1+Y-X,1-X,+Z; <sup>2</sup>1-Y,+X-Y,+Z; <sup>3</sup>1+Y-X,1-X,1-Z; <sup>4</sup>+X,+Y,1-Z; <sup>5</sup>1-Y,+X-Y,1-Z; <sup>6</sup>1-Y,1+X-Y,+Z;  
<sup>7</sup>+Y-X,1-X,+Z; <sup>8</sup>+Y-X,1-X,1-Z; <sup>9</sup>1-Y,1+X-Y,1-Z; <sup>10</sup>-Y,+X-Y,+Z; <sup>11</sup>+Y-X,-X,+Z; <sup>12</sup>+Y-X,-X,1-Z;  
<sup>13</sup>-Y,+X-Y,1-Z; <sup>14</sup>+X,+Y,-Z; <sup>15</sup>1-Y,+X-Y,-Z; <sup>16</sup>-Y,+X-Y,-Z



Table S9. Anisotropic displacement parameters ( $\text{\AA}^2 \times 10^3$ ) for  $\text{SrMg}_6\text{Ga}_6\text{Se}_{16}$ .

| Atom | $U_{11}$ | $U_{22}$ | $U_{33}$ | $U_{23}$ | $U_{13}$ | $U_{12}$ |
|------|----------|----------|----------|----------|----------|----------|
| Sr1  | 28.3(17) | 28.3(17) | 25(3)    | 0        | 0        | 14.1(8)  |
| Sr2  | 26.0(18) | 26.0(18) | 27(3)    | 0        | 0        | 13.0(9)  |
| Sr3  | 26.9(17) | 26.9(17) | 27(3)    | 0        | 0        | 13.5(8)  |
| Mg1  | 24(6)    | 21(5)    | 30(5)    | 0        | 0        | 11(5)    |
| Mg2  | 23(5)    | 28(6)    | 19(4)    | 0        | 0        | 13(5)    |
| Mg3  | 25(5)    | 23(6)    | 22(5)    | 0        | 0        | 10(5)    |
| Mg4  | 28(6)    | 35(6)    | 13(4)    | 0        | 0        | 19(5)    |
| Mg5  | 33(7)    | 38(7)    | 16(5)    | 0        | 0        | 25(6)    |
| Mg6  | 26(6)    | 19(5)    | 22(5)    | 0        | 0        | 14(5)    |
| Ga1  | 20.1(9)  | 19.7(9)  | 19.3(9)  | 1.3(12)  | 0.0(11)  | 9.4(7)   |
| Ga2  | 19.0(9)  | 19.0(8)  | 18.5(8)  | -1.4(11) | 2.1(12)  | 9.4(6)   |
| Ga3  | 20.6(8)  | 18.8(9)  | 17.1(6)  | -2.0(12) | -1.2(11) | 9.9(8)   |
| Se1  | 20.2(8)  | 21.1(9)  | 19.1(9)  | 2.0(11)  | -0.3(12) | 8.6(6)   |
| Se2  | 20.0(18) | 20.8(19) | 16.5(14) | 0        | 0        | 10.7(14) |
| Se3  | 17.9(17) | 27(2)    | 20.0(16) | 0        | 0        | 13.1(15) |
| Se4  | 16.9(7)  | 19.6(7)  | 19.6(7)  | -0.3(12) | -0.6(11) | 9.2(6)   |
| Se5  | 20.0(18) | 16.6(17) | 18.9(19) | 0        | 0        | 8.4(15)  |
| Se6  | 23.9(8)  | 19.6(8)  | 20.5(8)  | 1.2(12)  | 1.5(15)  | 11.8(7)  |
| Se7  | 19.1(19) | 17.9(17) | 18(2)    | 0        | 0        | 6.2(16)  |
| Se8  | 18.2(8)  | 17.7(8)  | 19.0(7)  | 0.3(11)  | -0.8(10) | 8.6(6)   |
| Se9  | 24.2(9)  | 20.4(8)  | 19.8(8)  | -0.1(12) | 1.5(16)  | 12.4(7)  |
| Se10 | 21.5(17) | 20(2)    | 14.6(14) | 0        | 0        | 12.0(14) |
| Se11 | 15.3(15) | 26(2)    | 18.1(15) | 0        | 0        | 11.1(14) |

Table S10. Atomic coordinates ( $\times 10^4$ ), equivalent isotropic displacement parameters

( $\text{\AA}^2 \times 10^3$ ) and bond valence calculations for  $\text{BaMg}_6\text{Ga}_6\text{Se}_{16}$ .

| Atom              | Wyckoff    | <i>x</i>   | <i>y</i>   | <i>z</i>   | U(eq)    | BVS <sup>a)</sup> |
|-------------------|------------|------------|------------|------------|----------|-------------------|
| Ba1               | 1 <i>c</i> | 3333.33    | 6666.67    | 10000      | 23.5(6)  | 2.14              |
| Ba2               | 1 <i>e</i> | 6666.67    | 3333.33    | 0          | 22.7(6)  | 2.14              |
| Ba3               | 1 <i>a</i> | 0          | 0          | 0          | 20.6(6)  | 2.20              |
| Ba4               | 1 <i>b</i> | 0          | 0          | 5000       | 28(5)    | 2.24              |
| Mg1               | 3 <i>k</i> | 3750(6)    | 4626(5)    | 5000       | 19.7(17) | 2.13              |
| Mg2               | 3 <i>k</i> | 7117(6)    | 5823(6)    | 5000       | 23.1(18) | 2.04              |
| Mg3               | 3 <i>j</i> | 3852(6)    | 4656(6)    | 0          | 25(2)    | 2.06              |
| Mg4               | 3 <i>j</i> | 7199(6)    | 5890(6)    | 0          | 24.5(17) | 1.97              |
| Mg5               | 3 <i>k</i> | 597(6)     | 2547(5)    | 0          | 23.5(18) | 1.89              |
| Mg6               | 3 <i>j</i> | 510(5)     | 2467(6)    | 5000       | 23.4(19) | 1.99              |
| Ga1               | 6 <i>l</i> | 5529.9(12) | 6893.3(10) | 7477(3)    | 17.7(4)  | 2.99              |
| Ga2               | 6 <i>l</i> | 4785.9(11) | 3634.3(12) | 2539(3)    | 18.1(5)  | 2.95              |
| Ga3               | 6 <i>l</i> | 2268.6(11) | 1904.1(11) | 2522(3)    | 16.8(3)  | 3.03              |
| Se1               | 3 <i>j</i> | 5806.9(16) | 7838(2)    | 10000      | 18.4(5)  | 1.79              |
| Se2               | 6 <i>l</i> | 4095.3(12) | 5732.8(12) | 7489(2)    | 18.5(3)  | 2.17              |
| Se3               | 3 <i>k</i> | 5895.6(16) | 7863.5(18) | 5000       | 16.4(5)  | 1.91              |
| Se4               | 6 <i>l</i> | 6781.6(10) | 6717.3(10) | 7517(4)    | 16.3(3)  | 1.91              |
| Se5               | 3 <i>j</i> | 5411(2)    | 4567(2)    | 0          | 18.6(5)  | 1.78              |
| Se6               | 6 <i>l</i> | 4970.5(10) | 2415.9(11) | 2514(2)    | 19.7(3)  | 2.10              |
| Se7               | 3 <i>k</i> | 5364(2)    | 4615(2)    | 5000       | 18.3(5)  | 1.89              |
| Se8               | 6 <i>l</i> | 3331.3(9)  | 3432.2(9)  | 2489(4)    | 17.3(3)  | 2.19              |
| Se9               | 6 <i>l</i> | 849.1(12)  | 1693.0(12) | 2507.2(19) | 20.0(3)  | 2.10              |
| Se10              | 3 <i>j</i> | 2495.3(17) | 1235(2)    | 0          | 18.7(5)  | 1.90              |
| Se11              | 3 <i>k</i> | 2580.5(16) | 1277(2)    | 5000       | 18.0(5)  | 1.97              |
| GII <sup>b)</sup> |            |            |            | 0.128      |          |                   |

<sup>a)</sup>The bond valence sum is calculated by bond-valence theory ( $S_{ij} = \exp[(R_0 - R)/B]$ , where  $R$  is an empirical constant,  $R_0$  is the length of bond I (in angstroms), and  $B = 0.37$ ).

<sup>b)</sup>The global instability index (GII) calculated using

$$G = \sqrt{\frac{\sum_{i=1}^n (BVS - v_i)}{N}}$$

where  $N$  is the number of atoms in the formula unit. The GII is calculated as 0.128 which is lower than 0.2 indicating the rationality of the structure from this side.

Table S11. Selected bond lengths [Å] for BaMg<sub>6</sub>Ga<sub>6</sub>Se<sub>16</sub>.

| Atom | Atom               | Length/Å   | Atom | Atom               | Length/Å  |
|------|--------------------|------------|------|--------------------|-----------|
| Ba1  | Se2 <sup>6</sup>   | 3.2606(16) | Mg3  | Se1 <sup>23</sup>  | 2.907(10) |
| Ba1  | Se2                | 3.2605(16) | Mg3  | Se2 <sup>20</sup>  | 2.614(6)  |
| Ba1  | Se2 <sup>5</sup>   | 3.2606(16) | Mg3  | Se2 <sup>14</sup>  | 2.614(6)  |
| Ba1  | Se2 <sup>7</sup>   | 3.2606(16) | Mg3  | Se5                | 2.847(9)  |
| Ba1  | Se2 <sup>4</sup>   | 3.2606(16) | Mg3  | Se8                | 2.705(7)  |
| Ba1  | Se2 <sup>8</sup>   | 3.2606(16) | Mg3  | Se8 <sup>13</sup>  | 2.705(7)  |
| Ba2  | Se6 <sup>10</sup>  | 3.2612(16) | Mg4  | Se4 <sup>20</sup>  | 2.742(6)  |
| Ba2  | Se6 <sup>9</sup>   | 3.2611(16) | Mg4  | Se4 <sup>14</sup>  | 2.742(6)  |
| Ba2  | Se6 <sup>11</sup>  | 3.2612(16) | Mg4  | Se5                | 2.849(10) |
| Ba2  | Se6 <sup>12</sup>  | 3.2611(16) | Mg4  | Se6 <sup>11</sup>  | 2.651(6)  |
| Ba2  | Se6                | 3.2612(16) | Mg4  | Se6 <sup>10</sup>  | 2.651(6)  |
| Ba2  | Se6 <sup>13</sup>  | 3.2612(16) | Mg4  | Se10 <sup>10</sup> | 2.800(10) |
| Ba3  | Se9 <sup>16</sup>  | 3.2518(17) | Mg5  | Se1 <sup>23</sup>  | 2.749(9)  |
| Ba3  | Se9                | 3.2518(17) | Mg5  | Se4 <sup>23</sup>  | 2.816(6)  |
| Ba3  | Se9 <sup>17</sup>  | 3.2518(17) | Mg5  | Se4 <sup>24</sup>  | 2.816(6)  |
| Ba3  | Se9 <sup>18</sup>  | 3.2517(17) | Mg5  | Se9 <sup>13</sup>  | 2.643(6)  |
| Ba3  | Se9 <sup>13</sup>  | 3.2517(17) | Mg5  | Se9                | 2.643(6)  |
| Ba3  | Se9 <sup>15</sup>  | 3.2517(17) | Mg5  | Se10 <sup>15</sup> | 2.890(9)  |
| Ba4  | Se9                | 3.2451(17) | Mg6  | Se3 <sup>4</sup>   | 2.758(9)  |
| Ba4  | Se9 <sup>19</sup>  | 3.2450(17) | Mg6  | Se4 <sup>4</sup>   | 2.831(6)  |
| Ba4  | Se9 <sup>20</sup>  | 3.2450(17) | Mg6  | Se4 <sup>24</sup>  | 2.831(6)  |
| Ba4  | Se9 <sup>17</sup>  | 3.2451(17) | Mg6  | Se9 <sup>20</sup>  | 2.616(6)  |
| Ba4  | Se9 <sup>21</sup>  | 3.2451(17) | Mg6  | Se9                | 2.616(6)  |
| Ba4  | Se9 <sup>15</sup>  | 3.2450(17) | Mg6  | Se11 <sup>15</sup> | 2.786(9)  |
| Mg1  | Se2 <sup>20</sup>  | 2.605(6)   | Ga1  | Se1                | 2.467(3)  |
| Mg1  | Se2                | 2.605(6)   | Ga1  | Se2                | 2.339(2)  |
| Mg1  | Se3 <sup>4</sup>   | 2.814(9)   | Ga1  | Se3                | 2.447(3)  |
| Mg1  | Se7                | 2.872(9)   | Ga1  | Se4                | 2.391(3)  |
| Mg1  | Se8 <sup>20</sup>  | 2.700(6)   | Ga2  | Se5                | 2.458(3)  |
| Mg1  | Se8                | 2.700(6)   | Ga2  | Se6                | 2.342(2)  |
| Mg2  | Se4 <sup>20</sup>  | 2.767(7)   | Ga2  | Se7                | 2.443(3)  |
| Mg2  | Se4                | 2.767(7)   | Ga2  | Se8                | 2.421(2)  |
| Mg2  | Se6 <sup>10</sup>  | 2.625(6)   | Ga3  | Se8                | 2.406(2)  |
| Mg2  | Se6 <sup>22</sup>  | 2.625(6)   | Ga3  | Se9                | 2.352(2)  |
| Mg2  | Se7                | 2.755(10)  | Ga3  | Se10               | 2.430(3)  |
| Mg2  | Se11 <sup>10</sup> | 2.816(10)  | Ga3  | Se11               | 2.426(3)  |

<sup>1</sup>+Y-X,1-X,1+Z; <sup>2</sup>1-Y,1+X-Y,1+Z; <sup>3</sup>+X,+Y,1+Z; <sup>4</sup>+Y-X,1-X,+Z; <sup>5</sup>1-Y,1+X-Y,+Z; <sup>6</sup>+Y-X,1-X,2-Z;  
<sup>7</sup>+X,+Y,2-Z; <sup>8</sup>1-Y,1+X-Y,2-Z; <sup>9</sup>1-Y,+X-Y,+Z; <sup>10</sup>1+Y-X,1-X,+Z; <sup>11</sup>1+Y-X,1-X,-Z; <sup>12</sup>1-Y,+X-Y,-Z;  
<sup>13</sup>+X,+Y,-Z; <sup>14</sup>+X,+Y,-1+Z; <sup>15</sup>-Y,+X-Y,+Z; <sup>16</sup>+Y-X,-X,-Z; <sup>17</sup>+Y-X,-X,+Z; <sup>18</sup>-Y,+X-Y,-Z; <sup>19</sup>-Y,+X-  
Y,1-Z; <sup>20</sup>+X,+Y,1-Z; <sup>21</sup>+Y-X,-X,1-Z; <sup>22</sup>1+Y-X,1-X,1-Z; <sup>23</sup>+Y-X,1-X,-1+Z; <sup>24</sup>+Y-X,1-X,1-Z

Table S12. Selected bond angles [°] for BaMg<sub>6</sub>Ga<sub>6</sub>Se<sub>16</sub>.

| Atom              | Atom | Atom              | Angle/°     | Atom               | Atom | Atom               | Angle/°  |
|-------------------|------|-------------------|-------------|--------------------|------|--------------------|----------|
| Se2 <sup>5</sup>  | Ba1  | Se2 <sup>4</sup>  | 87.72(4)    | Se6 <sup>22</sup>  | Mg2  | Se4                | 87.32(6) |
| Se2 <sup>5</sup>  | Ba1  | Se2 <sup>6</sup>  | 73.72(6)    | Se6 <sup>10</sup>  | Mg2  | Se6 <sup>22</sup>  | 95.1(3)  |
| Se2 <sup>5</sup>  | Ba1  | Se2 <sup>7</sup>  | 132.838(19) | Se6 <sup>10</sup>  | Mg2  | Se7                | 92.8(2)  |
| Se2 <sup>6</sup>  | Ba1  | Se2 <sup>8</sup>  | 87.72(4)    | Se6 <sup>22</sup>  | Mg2  | Se7                | 92.8(2)  |
| Se2 <sup>6</sup>  | Ba1  | Se2 <sup>7</sup>  | 87.72(4)    | Se6 <sup>22</sup>  | Mg2  | Se11 <sup>10</sup> | 99.4(3)  |
| Se2               | Ba1  | Se2 <sup>8</sup>  | 73.72(6)    | Se6 <sup>10</sup>  | Mg2  | Se11 <sup>10</sup> | 99.4(3)  |
| Se2 <sup>5</sup>  | Ba1  | Se2               | 87.72(4)    | Se7                | Mg2  | Se4                | 87.9(2)  |
| Se2 <sup>6</sup>  | Ba1  | Se2 <sup>4</sup>  | 132.838(19) | Se7                | Mg2  | Se4 <sup>20</sup>  | 87.9(2)  |
| Se2 <sup>6</sup>  | Ba1  | Se2               | 132.837(19) | Se7                | Mg2  | Se11 <sup>10</sup> | 161.8(4) |
| Se2 <sup>7</sup>  | Ba1  | Se2 <sup>8</sup>  | 87.72(4)    | Se2 <sup>14</sup>  | Mg3  | Se1 <sup>23</sup>  | 87.8(2)  |
| Se2 <sup>7</sup>  | Ba1  | Se2               | 132.838(19) | Se2 <sup>20</sup>  | Mg3  | Se1 <sup>23</sup>  | 87.8(2)  |
| Se2 <sup>7</sup>  | Ba1  | Se2 <sup>4</sup>  | 73.72(6)    | Se2 <sup>20</sup>  | Mg3  | Se2 <sup>14</sup>  | 96.9(3)  |
| Se2 <sup>4</sup>  | Ba1  | Se2               | 87.72(4)    | Se2 <sup>14</sup>  | Mg3  | Se5                | 103.3(2) |
| Se2 <sup>5</sup>  | Ba1  | Se2 <sup>8</sup>  | 132.838(19) | Se2 <sup>20</sup>  | Mg3  | Se5                | 103.3(2) |
| Se2 <sup>4</sup>  | Ba1  | Se2 <sup>8</sup>  | 132.838(19) | Se2 <sup>20</sup>  | Mg3  | Se8 <sup>13</sup>  | 171.0(4) |
| Se6 <sup>9</sup>  | Ba2  | Se6 <sup>13</sup> | 132.870(18) | Se2 <sup>20</sup>  | Mg3  | Se8                | 85.14(7) |
| Se6 <sup>10</sup> | Ba2  | Se6 <sup>11</sup> | 73.82(6)    | Se2 <sup>14</sup>  | Mg3  | Se8 <sup>13</sup>  | 85.14(7) |
| Se6 <sup>9</sup>  | Ba2  | Se6               | 87.65(4)    | Se2 <sup>14</sup>  | Mg3  | Se8                | 171.0(4) |
| Se6 <sup>9</sup>  | Ba2  | Se6 <sup>10</sup> | 87.65(4)    | Se5                | Mg3  | Se1 <sup>23</sup>  | 163.1(4) |
| Se6 <sup>9</sup>  | Ba2  | Se6 <sup>12</sup> | 73.82(6)    | Se8 <sup>13</sup>  | Mg3  | Se1 <sup>23</sup>  | 83.6(2)  |
| Se6 <sup>9</sup>  | Ba2  | Se6 <sup>11</sup> | 132.870(18) | Se8                | Mg3  | Se1 <sup>23</sup>  | 83.6(2)  |
| Se6               | Ba2  | Se6 <sup>11</sup> | 132.868(18) | Se8 <sup>13</sup>  | Mg3  | Se5                | 84.6(2)  |
| Se6 <sup>12</sup> | Ba2  | Se6 <sup>13</sup> | 87.65(4)    | Se8                | Mg3  | Se5                | 84.6(2)  |
| Se6 <sup>13</sup> | Ba2  | Se6 <sup>11</sup> | 87.65(4)    | Se8                | Mg3  | Se8 <sup>13</sup>  | 91.6(3)  |
| Se6               | Ba2  | Se6 <sup>10</sup> | 87.65(4)    | Se4 <sup>20</sup>  | Mg4  | Se4 <sup>14</sup>  | 89.7(3)  |
| Se6 <sup>12</sup> | Ba2  | Se6 <sup>11</sup> | 87.65(4)    | Se4 <sup>20</sup>  | Mg4  | Se5                | 87.4(2)  |
| Se6               | Ba2  | Se6 <sup>13</sup> | 73.82(6)    | Se4 <sup>14</sup>  | Mg4  | Se5                | 87.4(2)  |
| Se6 <sup>13</sup> | Ba2  | Se6 <sup>10</sup> | 132.867(18) | Se4 <sup>20</sup>  | Mg4  | Se10 <sup>10</sup> | 80.8(2)  |
| Se6 <sup>12</sup> | Ba2  | Se6               | 132.869(18) | Se4 <sup>14</sup>  | Mg4  | Se10 <sup>10</sup> | 80.8(2)  |
| Se6 <sup>12</sup> | Ba2  | Se6 <sup>10</sup> | 132.870(18) | Se6 <sup>10</sup>  | Mg4  | Se4 <sup>14</sup>  | 174.4(4) |
| Se9 <sup>15</sup> | Ba3  | Se9 <sup>17</sup> | 132.871(19) | Se6 <sup>11</sup>  | Mg4  | Se4 <sup>20</sup>  | 174.4(4) |
| Se9               | Ba3  | Se9 <sup>17</sup> | 132.873(19) | Se6 <sup>11</sup>  | Mg4  | Se4 <sup>14</sup>  | 87.32(7) |
| Se9 <sup>13</sup> | Ba3  | Se9 <sup>16</sup> | 132.871(19) | Se6 <sup>10</sup>  | Mg4  | Se4 <sup>20</sup>  | 87.32(7) |
| Se9 <sup>13</sup> | Ba3  | Se9 <sup>17</sup> | 87.64(4)    | Se6 <sup>11</sup>  | Mg4  | Se5                | 87.8(2)  |
| Se9 <sup>18</sup> | Ba3  | Se9 <sup>16</sup> | 132.871(19) | Se6 <sup>10</sup>  | Mg4  | Se5                | 87.8(2)  |
| Se9 <sup>17</sup> | Ba3  | Se9 <sup>16</sup> | 73.83(6)    | Se6 <sup>11</sup>  | Mg4  | Se6 <sup>10</sup>  | 95.3(3)  |
| Se9 <sup>15</sup> | Ba3  | Se9               | 87.64(4)    | Se6 <sup>11</sup>  | Mg4  | Se10 <sup>10</sup> | 103.4(2) |
| Se9 <sup>18</sup> | Ba3  | Se9               | 132.874(19) | Se6 <sup>10</sup>  | Mg4  | Se10 <sup>10</sup> | 103.4(2) |
| Se9 <sup>18</sup> | Ba3  | Se9 <sup>17</sup> | 87.64(4)    | Se10 <sup>10</sup> | Mg4  | Se5                | 163.2(3) |
| Se9               | Ba3  | Se9 <sup>16</sup> | 87.64(4)    | Se1 <sup>23</sup>  | Mg5  | Se4 <sup>23</sup>  | 84.9(2)  |

|                    |     |                    |             |                    |     |                    |            |
|--------------------|-----|--------------------|-------------|--------------------|-----|--------------------|------------|
| Se9 <sup>18</sup>  | Ba3 | Se9 <sup>15</sup>  | 73.83(6)    | Se1 <sup>23</sup>  | Mg5 | Se4 <sup>24</sup>  | 84.9(2)    |
| Se9 <sup>13</sup>  | Ba3 | Se9                | 73.83(6)    | Se1 <sup>23</sup>  | Mg5 | Se10 <sup>15</sup> | 156.3(3)   |
| Se9 <sup>18</sup>  | Ba3 | Se9 <sup>13</sup>  | 87.64(4)    | Se4 <sup>24</sup>  | Mg5 | Se4 <sup>23</sup>  | 86.8(3)    |
| Se9 <sup>13</sup>  | Ba3 | Se9 <sup>15</sup>  | 132.875(19) | Se4 <sup>23</sup>  | Mg5 | Se10 <sup>15</sup> | 78.0(2)    |
| Se9 <sup>15</sup>  | Ba3 | Se9 <sup>16</sup>  | 87.64(4)    | Se4 <sup>24</sup>  | Mg5 | Se10 <sup>15</sup> | 78.0(2)    |
| Se9 <sup>16</sup>  | Ba3 | Se10 <sup>16</sup> | 66.61(5)    | Se9                | Mg5 | Se1 <sup>23</sup>  | 106.1(2)   |
| Se9 <sup>17</sup>  | Ba3 | Se10 <sup>16</sup> | 66.61(5)    | Se9 <sup>13</sup>  | Mg5 | Se1 <sup>23</sup>  | 106.1(2)   |
| Se9 <sup>13</sup>  | Ba3 | Se10 <sup>16</sup> | 143.08(3)   | Se9                | Mg5 | Se4 <sup>23</sup>  | 167.2(4)   |
| Se9                | Ba3 | Se10 <sup>16</sup> | 143.09(3)   | Se9                | Mg5 | Se4 <sup>24</sup>  | 87.72(8)   |
| Se9 <sup>15</sup>  | Ba3 | Se10 <sup>16</sup> | 66.26(5)    | Se9 <sup>13</sup>  | Mg5 | Se4 <sup>23</sup>  | 87.72(8)   |
| Se9 <sup>18</sup>  | Ba3 | Se10 <sup>16</sup> | 66.26(5)    | Se9 <sup>13</sup>  | Mg5 | Se4 <sup>24</sup>  | 167.2(4)   |
| Se10 <sup>16</sup> | Ba3 | Se10 <sup>15</sup> | 120         | Se9                | Mg5 | Se9 <sup>13</sup>  | 95.3(3)    |
| Se9 <sup>15</sup>  | Ba4 | Se9 <sup>16</sup>  | 87.87(4)    | Se9                | Mg5 | Se10 <sup>15</sup> | 89.6(2)    |
| Se9 <sup>20</sup>  | Ba4 | Se9                | 73.51(6)    | Se9 <sup>13</sup>  | Mg5 | Se10 <sup>15</sup> | 89.6(2)    |
| Se9 <sup>15</sup>  | Ba4 | Se9 <sup>21</sup>  | 73.51(6)    | Se3 <sup>5</sup>   | Mg6 | Se4 <sup>5</sup>   | 82.7(2)    |
| Se9 <sup>15</sup>  | Ba4 | Se9                | 87.87(4)    | Se3 <sup>5</sup>   | Mg6 | Se4 <sup>24</sup>  | 82.7(2)    |
| Se9 <sup>15</sup>  | Ba4 | Se9 <sup>20</sup>  | 132.772(19) | Se3 <sup>5</sup>   | Mg6 | Se11 <sup>15</sup> | 154.2(3)   |
| Se9                | Ba4 | Se9 <sup>19</sup>  | 132.769(19) | Se4 <sup>5</sup>   | Mg6 | Se4 <sup>24</sup>  | 87.7(3)    |
| Se9                | Ba4 | Se9 <sup>16</sup>  | 87.87(4)    | Se9 <sup>20</sup>  | Mg6 | Se3 <sup>5</sup>   | 102.2(2)   |
| Se9 <sup>20</sup>  | Ba4 | Se9 <sup>16</sup>  | 132.768(19) | Se9                | Mg6 | Se3 <sup>5</sup>   | 102.2(2)   |
| Se9 <sup>19</sup>  | Ba4 | Se9 <sup>16</sup>  | 73.51(6)    | Se9 <sup>20</sup>  | Mg6 | Se4 <sup>5</sup>   | 87.93(7)   |
| Se9 <sup>21</sup>  | Ba4 | Se9                | 132.770(19) | Se9 <sup>20</sup>  | Mg6 | Se4 <sup>24</sup>  | 172.9(3)   |
| Se9 <sup>21</sup>  | Ba4 | Se9 <sup>19</sup>  | 87.87(4)    | Se9                | Mg6 | Se4 <sup>5</sup>   | 172.9(3)   |
| Se9 <sup>21</sup>  | Ba4 | Se9 <sup>16</sup>  | 132.768(19) | Se9                | Mg6 | Se4 <sup>24</sup>  | 87.93(7)   |
| Se9 <sup>20</sup>  | Ba4 | Se9 <sup>19</sup>  | 87.87(4)    | Se9                | Mg6 | Se9 <sup>20</sup>  | 95.9(3)    |
| Se9 <sup>20</sup>  | Ba4 | Se9 <sup>21</sup>  | 87.87(4)    | Se9                | Mg6 | Se11 <sup>15</sup> | 94.9(2)    |
| Se9 <sup>15</sup>  | Ba4 | Se9 <sup>19</sup>  | 132.768(19) | Se9 <sup>20</sup>  | Mg6 | Se11 <sup>15</sup> | 94.9(2)    |
| Se2 <sup>20</sup>  | Mg1 | Se2                | 96.2(3)     | Se11 <sup>15</sup> | Mg6 | Se4 <sup>24</sup>  | 78.7(2)    |
| Se2                | Mg1 | Se3 <sup>5</sup>   | 92.9(2)     | Se11 <sup>15</sup> | Mg6 | Se4 <sup>5</sup>   | 78.7(2)    |
| Se2 <sup>20</sup>  | Mg1 | Se3 <sup>5</sup>   | 92.9(2)     | Se2                | Ga1 | Se1                | 110.72(11) |
| Se2 <sup>20</sup>  | Mg1 | Se7                | 98.4(2)     | Se2                | Ga1 | Se3                | 114.27(11) |
| Se2                | Mg1 | Se7                | 98.4(2)     | Se2                | Ga1 | Se4                | 123.87(9)  |
| Se2                | Mg1 | Se8 <sup>20</sup>  | 85.43(7)    | Se3                | Ga1 | Se1                | 104.96(9)  |
| Se2 <sup>20</sup>  | Mg1 | Se8 <sup>20</sup>  | 177.6(3)    | Se4                | Ga1 | Se1                | 101.27(11) |
| Se2                | Mg1 | Se8                | 177.6(3)    | Se4                | Ga1 | Se3                | 99.51(11)  |
| Se2 <sup>20</sup>  | Mg1 | Se8                | 85.43(7)    | Se6                | Ga2 | Se5                | 112.95(11) |
| Se3 <sup>5</sup>   | Mg1 | Se7                | 163.1(3)    | Se6                | Ga2 | Se7                | 117.46(11) |
| Se8 <sup>20</sup>  | Mg1 | Se3 <sup>5</sup>   | 85.4(2)     | Se6                | Ga2 | Se8                | 119.57(10) |
| Se8                | Mg1 | Se3 <sup>5</sup>   | 85.4(2)     | Se7                | Ga2 | Se5                | 105.36(11) |
| Se8 <sup>20</sup>  | Mg1 | Se7                | 83.0(2)     | Se8                | Ga2 | Se5                | 100.08(12) |
| Se8                | Mg1 | Se7                | 83.0(2)     | Se8                | Ga2 | Se7                | 98.92(12)  |
| Se8                | Mg1 | Se8 <sup>20</sup>  | 92.9(3)     | Se8                | Ga3 | Se10               | 108.28(11) |
| Se4 <sup>20</sup>  | Mg2 | Se4                | 90.3(3)     | Se8                | Ga3 | Se11               | 107.17(11) |

|                   |     |                    |          |      |     |      |            |
|-------------------|-----|--------------------|----------|------|-----|------|------------|
| Se4               | Mg2 | Se11 <sup>10</sup> | 79.3(2)  | Se9  | Ga3 | Se8  | 110.63(9)  |
| Se4 <sup>20</sup> | Mg2 | Se11 <sup>10</sup> | 79.3(2)  | Se9  | Ga3 | Se10 | 110.09(11) |
| Se6 <sup>22</sup> | Mg2 | Se4 <sup>20</sup>  | 177.5(3) | Se9  | Ga3 | Se11 | 113.70(11) |
| Se6 <sup>10</sup> | Mg2 | Se4                | 177.5(3) | Se11 | Ga3 | Se10 | 106.75(9)  |
| Se6 <sup>10</sup> | Mg2 | Se4 <sup>20</sup>  | 87.32(6) |      |     |      |            |

<sup>1</sup>+Y-X,1-X,1+Z; <sup>2</sup>1-Y,1+X-Y,1+Z; <sup>3</sup>+X,+Y,1+Z; <sup>4</sup>+Y-X,1-X,+Z; <sup>5</sup>1-Y,1+X-Y,+Z; <sup>6</sup>+Y-X,1-X,2-Z;  
<sup>7</sup>+X,+Y,2-Z; <sup>8</sup>1-Y,1+X-Y,2-Z; <sup>9</sup>1-Y,+X-Y,+Z; <sup>10</sup>1+Y-X,1-X,+Z; <sup>11</sup>1+Y-X,1-X,-Z; <sup>12</sup>1-Y,+X-Y,-Z;  
<sup>13</sup>+X,+Y,-Z; <sup>14</sup>+X,+Y,-1+Z; <sup>15</sup>-Y,+X-Y,+Z; <sup>16</sup>+Y-X,-X,-Z; <sup>17</sup>+Y-X,-X,+Z; <sup>18</sup>-Y,+X-Y,-Z; <sup>19</sup>-  
Y,+X-Y,1-Z; <sup>20</sup>+X,+Y,1-Z; <sup>21</sup>+Y-X,-X,1-Z; <sup>22</sup>1+Y-X,1-X,1-Z; <sup>23</sup>+Y-X,1-X,-1+Z; <sup>24</sup>+Y-X,1-X,1-Z

Table S13. Anisotropic displacement parameters ( $\text{\AA}^2 \times 10^3$ ) for BaMg<sub>6</sub>Ga<sub>6</sub>Se<sub>16</sub>.

| Atom | U <sub>11</sub> | U <sub>22</sub> | U <sub>33</sub> | U <sub>23</sub> | U <sub>13</sub> | U <sub>12</sub> |
|------|-----------------|-----------------|-----------------|-----------------|-----------------|-----------------|
| Ba1  | 22.8(9)         | 22.8(9)         | 24.9(14)        | 0               | 0               | 11.4(4)         |
| Ba2  | 23.2(8)         | 23.2(8)         | 21.7(13)        | 0               | 0               | 11.6(4)         |
| Ba3  | 19.0(9)         | 19.0(9)         | 23.8(14)        | 0               | 0               | 9.5(4)          |
| Mg1  | 31(5)           | 15(4)           | 14(3)           | 0               | 0               | 12(4)           |
| Mg2  | 24(4)           | 22(4)           | 19(3)           | 0               | 0               | 9(3)            |
| Mg3  | 32(5)           | 21(5)           | 12(3)           | 0               | 0               | 7(4)            |
| Mg4  | 28(5)           | 15(4)           | 31(4)           | 0               | 0               | 11(4)           |
| Mg5  | 30(4)           | 20(4)           | 23(4)           | 0               | 0               | 14(3)           |
| Mg6  | 25(5)           | 26(4)           | 24(4)           | 0               | 0               | 17(4)           |
| Ga1  | 17.6(8)         | 18.5(9)         | 16.7(6)         | -0.6(8)         | 1.4(8)          | 8.9(7)          |
| Ga2  | 19.0(9)         | 18.2(8)         | 17.7(7)         | -0.7(8)         | -0.5(8)         | 9.7(6)          |
| Ga3  | 16.4(7)         | 18.6(8)         | 16.2(6)         | 1.0(7)          | -0.7(7)         | 9.4(7)          |
| Se1  | 20.1(13)        | 21.5(12)        | 16.5(10)        | 0               | 0               | 12.5(10)        |
| Se2  | 17.8(7)         | 16.4(7)         | 18.9(7)         | -3.0(8)         | -0.2(8)         | 6.7(6)          |
| Se3  | 19.2(12)        | 14.6(11)        | 16.7(9)         | 0               | 0               | 9.6(9)          |
| Se4  | 15.8(7)         | 15.8(7)         | 17.8(7)         | 0.0(7)          | -1.1(7)         | 8.5(6)          |
| Se5  | 19.3(11)        | 15.4(11)        | 16.3(10)        | 0               | 0               | 5.1(11)         |
| Se6  | 23.2(8)         | 17.4(7)         | 18.9(8)         | -0.3(8)         | 2.1(7)          | 10.5(7)         |
| Se7  | 17.1(11)        | 19.6(13)        | 16.1(10)        | 0               | 0               | 7.8(10)         |
| Se8  | 17.0(6)         | 16.1(7)         | 17.9(5)         | -0.2(7)         | 0.7(6)          | 7.5(5)          |
| Se9  | 18.0(7)         | 24.0(8)         | 20.7(6)         | -1.2(8)         | -2.5(8)         | 12.4(7)         |
| Se10 | 23.4(13)        | 21.2(13)        | 16.6(10)        | 0               | 0               | 15.0(11)        |
| Se11 | 21.7(13)        | 16.9(12)        | 17.1(10)        | 0               | 0               | 11.0(10)        |

Table S14. The optical properties of  $A^{II}Mg_6Ga_6Se_{16}$  ( $A^{II} = Ca, Sr, Ba$ ).

| Compounds           | Band gaps (eV) |       |       | Calculated NLO coefficients (pm/V) | $\Delta n$ (@ 1064 nm) |
|---------------------|----------------|-------|-------|------------------------------------|------------------------|
|                     | Experimental   | GGA   | HSE06 |                                    |                        |
| $CaMg_6Ga_6Se_{16}$ | 2.71           | 1.851 | 2.568 | $d_{11} = -11.05, d_{22} = 3.92$   | 0.052                  |
| $SrMg_6Ga_6Se_{16}$ | 2.71           | 1.866 | 2.564 | $d_{11} = -10.67, d_{22} = 3.93$   | 0.048                  |
| $BaMg_6Ga_6Se_{16}$ | 2.69           | 1.853 | 2.556 | $d_{11} = -10.58, d_{22} = 3.71$   | 0.044                  |



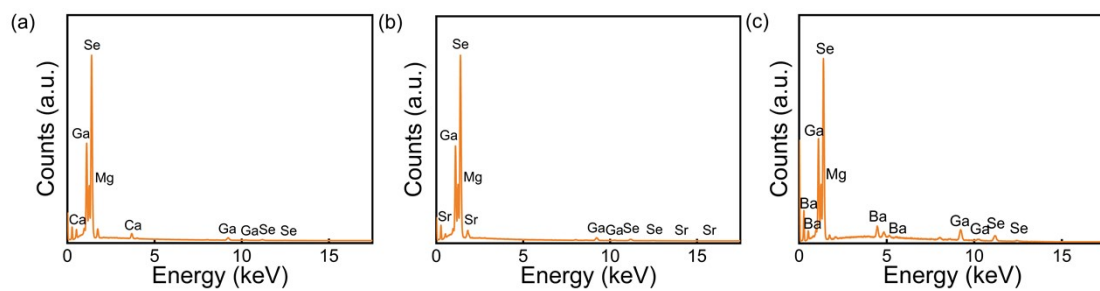

Figure S1. The EDS spectra of (a)  $\text{CaMg}_6\text{Ga}_6\text{Se}_{16}$ ; (b)  $\text{SrMg}_6\text{Ga}_6\text{Se}_{16}$ ; (c)  $\text{BaMg}_6\text{Ga}_6\text{Se}_{16}$ .

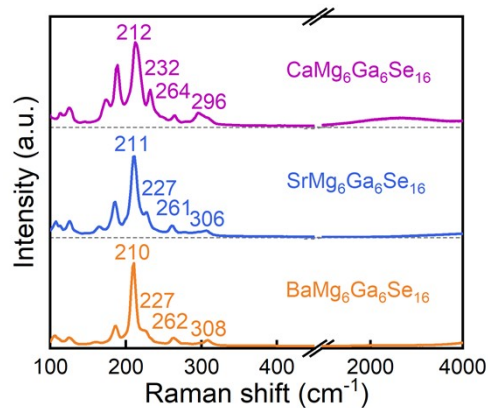

Figure S2. The Raman spectra of A<sup>II</sup>Mg<sub>6</sub>Ga<sub>6</sub>Se<sub>16</sub> (A<sup>II</sup> = Ca, Sr, Ba).

The peaks below 200 cm<sup>-1</sup> can be attributed to the vibration of Mg–Se bonding in [MgSe<sub>6</sub>].<sup>13</sup> And the peaks at 212, 232, 264, and 296 cm<sup>-1</sup> in CaMg<sub>6</sub>Ga<sub>6</sub>Se<sub>16</sub>, 211, 227, 261, and 306 cm<sup>-1</sup> in SrMg<sub>6</sub>Ga<sub>6</sub>Se<sub>16</sub>, 210, 227, 262, and 308 cm<sup>-1</sup> in BaMg<sub>6</sub>Ga<sub>6</sub>Se<sub>16</sub> can be attributed to the vibration of Mg–Se bonding in [GaSe<sub>4</sub>].<sup>13</sup>

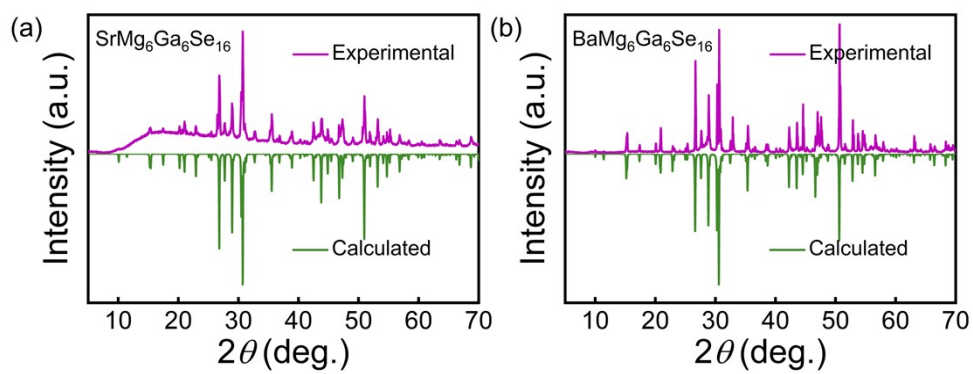

Figure S3. The XRD patterns of (a)  $\text{SrMg}_6\text{Ga}_6\text{Se}_{16}$ ; (b)  $\text{BaMg}_6\text{Ga}_6\text{Se}_{16}$ .

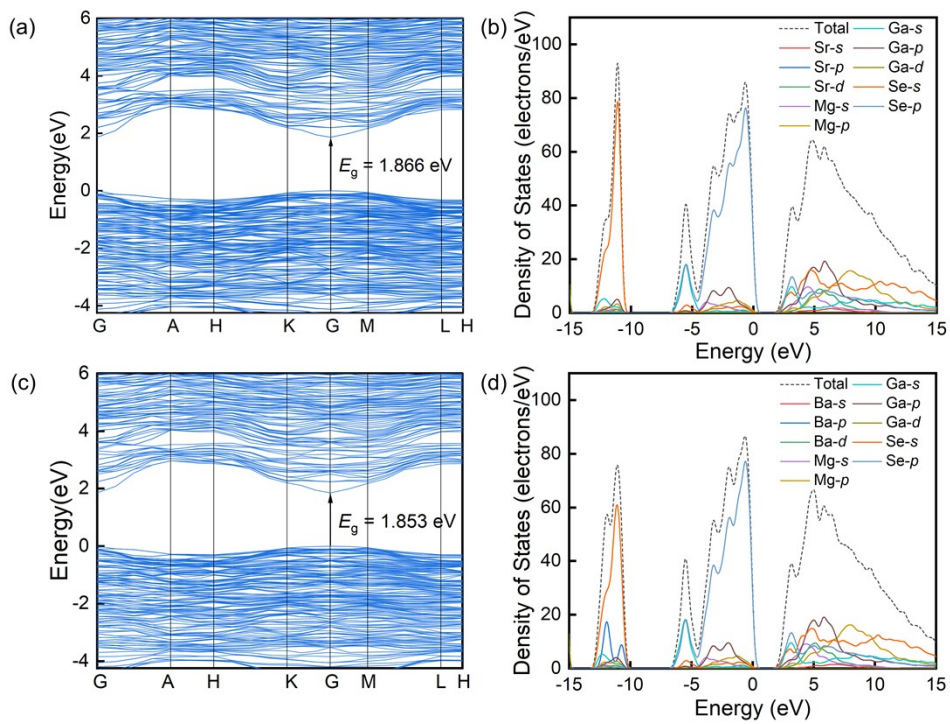

Figure S4. The band structures, total and partial density of states of  $\text{SrMg}_6\text{Ga}_6\text{Se}_{16}$  (a,b);  $\text{BaMg}_6\text{Ga}_6\text{Se}_{16}$  (c,d).

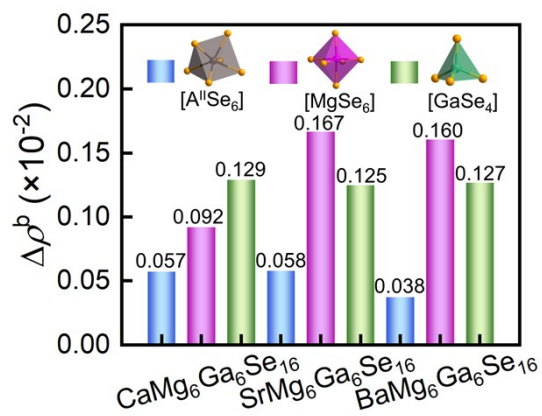

Figure S5. The bonding electron density differences ( $\Delta\rho^b$ ) of [A<sup>II</sup>Se<sub>6</sub>] triangular prisms, [MgSe<sub>6</sub>] octahedra and [GaSe<sub>4</sub>] tetrahedra in A<sup>II</sup>Mg<sub>6</sub>Ga<sub>6</sub>Se<sub>16</sub> calculated by REDA method.

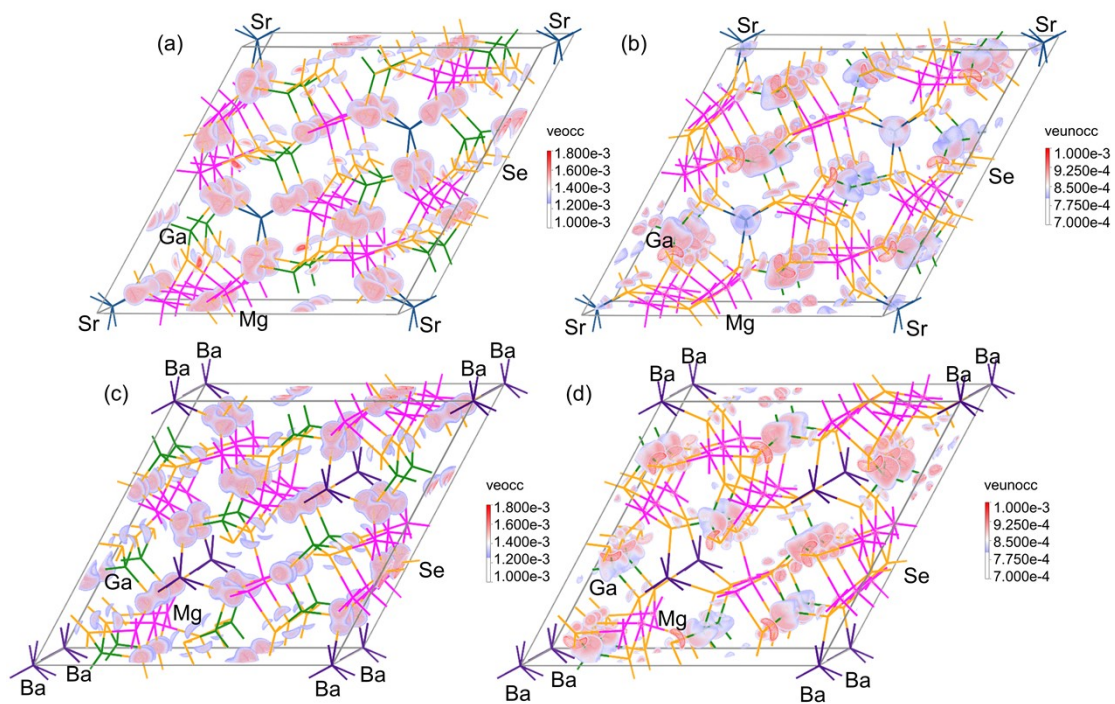

Figure S6. SHG density maps of occupied and unoccupied orbitals in the VE process.

(a,b) SrMg<sub>6</sub>Ga<sub>6</sub>Se<sub>16</sub>; (c,d) BaMg<sub>6</sub>Ga<sub>6</sub>Se<sub>16</sub>.

## Reference

- 1 J. Z. Zhou, L. A. Wang, Y. Chu, H. S. Wang, S. L. Pan and J. J. Li, *Adv. Opt. Mater.*, 2023, **11**, 2300736.
- 2 L. A. Wang, C. C. Tu, J. Z. Zhou, Y. Chu, Z. H. Yang, S. L. Pan and J. J. Li, *Adv. Opt. Mater.*, 2024, **12**, 2301634.
- 3 M. Mutailipu, M. Zhang, B. B. Zhang, L. Y. Wang, Z. H. Yang, X. Zhou and S. L. Pan, *Angew. Chem. Int. Ed.*, 2018, **57**, 6095–6099.
- 4 H. S. Wang, Y. Chu, X. T. Pan, Z. H. Yang, S. L. Pan and J. J. Li, *Mater. Today Phys.*, 2023, **38**, 101243.
- 5 X. F. Wang, Y. Wang, B. B. Zhang, F. F. Zhang, Z. H. Yang and S. L. Pan, *Angew. Chem. Int. Ed.*, 2017, **56**, 14119–14123.
- 6 J. J. Li, Z. Lian, Q. Li, Z. C. Wang, L. F. Liu, F. L. Deepak, Y. P. Liu, B. Li, J. Y. Xu and Z. X. Chen, *Nano Res.*, 2022, **15**, 5933–5939.
- 7 Y. Wang, B. B. Zhang, Z. H. Yang and S. L. Pan, *Angew. Chem. Int. Ed.*, 2018, **57**, 2150–2154.
- 8 B. B. Zhang, G. Q. Shi, Z. H. Yang, F. F. Zhang and S. L. Pan, *Angew. Chem. Int. Ed.*, 2017, **56**, 3916–3919.
- 9 Y. Chu, P. Wang, H. Zeng, S. C. Cheng, X. Su, Z. H. Yang, J. J. Li and S. L. Pan, *Chem. Mater.*, 2021, **33**, 6514–6521.
- 10 L. A. Wang, C. C. Tu, H. B. Gao, J. Z. Zhou, H. S. Wang, Z. H. Yang, S. L. Pan and J. J. Li, *Sci. China Chem.*, 2023, **66**, 1086–1093.
- 11 L. A. Wang, D. D. Chu, D. Q. Yin, C. W. Xie, Z. H. Yang, J. J. Li and S. L. Pan, *Mater. Today Phys.*, 2023, **38**, 101245.
- 12 B. H. Lei, Z. H. Yang, H. W. Yu, C. Cao, Z. Li, C. Hu, K. R. Poeppelmeier and S. L. Pan, *J. Am. Chem. Soc.*, 2018, **140**, 10726–10733.
- 13 P. Wang, Y. Chu, A. Tudi, C. W. Xie, Z. H. Yang, S. L. Pan and J. J. Li, *Adv. Sci.*, 2022, **9**, 2106120.
